# Supplementary material for: Shotgun Lipidomics for Differential Diagnosis of HPV-Associated Cervix Transformation
Source: MDPI journal article supplement (doi:10.3390/metabo12060503), 2022-05-31
Supplement: s1 [file s1]

## Supplementary

# Shotgun Lipidomics for Differential Diagnosis of HPV-Associated Cervix Transformation

Natalia L. Starodubtseva <sup>1,2,\*</sup>, Vitaliy V. Chagovets <sup>2</sup>, Maria E. Nekrasova <sup>2</sup>, Niso M. Nazarova <sup>2</sup>, Alisa O. Tokareva <sup>2,3</sup>, Olga V. Bourmenskaya <sup>2</sup>, Djamilja I. Attoeva <sup>2</sup>, Eugenii N. Kukaev <sup>1,2,3</sup>, Dmitriy Y. Trofimov <sup>2</sup>, Vladimir E. Frankevich <sup>2</sup> and Gennady T. Sukhikh <sup>2,4</sup>

<sup>1</sup> Moscow Institute of Physics and Technology, 141700 Moscow, Russia;  
e\_kukaev@oparina4.ru

<sup>2</sup> National Medical Research Center for Obstetrics Gynecology and Perinatology named after Academician V.I. Kulakov of the Ministry of Healthcare of Russian Federation, 117997 Moscow, Russia; v\_chagovets@oparina4.ru (V.V.C.); m\_nekrasova@oparina4.ru (M.E.N.); n\_nazarova@oparina4.ru (N.M.N.); alisa.tokareva@phystech.edu (A.O.T.); o\_bourmenskaya@oparina4.ru (O.V.B.); d\_attoeva@oparina4.ru (D.I.A.); d\_trofimov@oparina4.ru (D.Y.T.); vfrankevich@gmail.com (V.E.F.); g\_sukhikh@oparina4.ru (G.T.S.)

<sup>3</sup> V.L. Talrose Institute for Energy Problems of Chemical Physics, Russia Academy of Sciences, 119991 Moscow, Russia

<sup>4</sup> Department of Obstetrics, Gynecology, Perinatology and Reproductology, First Moscow State Medical University named after I.M. Sechenov, 119991 Moscow, Russia

\* Correspondence: n.starodub@phystech.edu

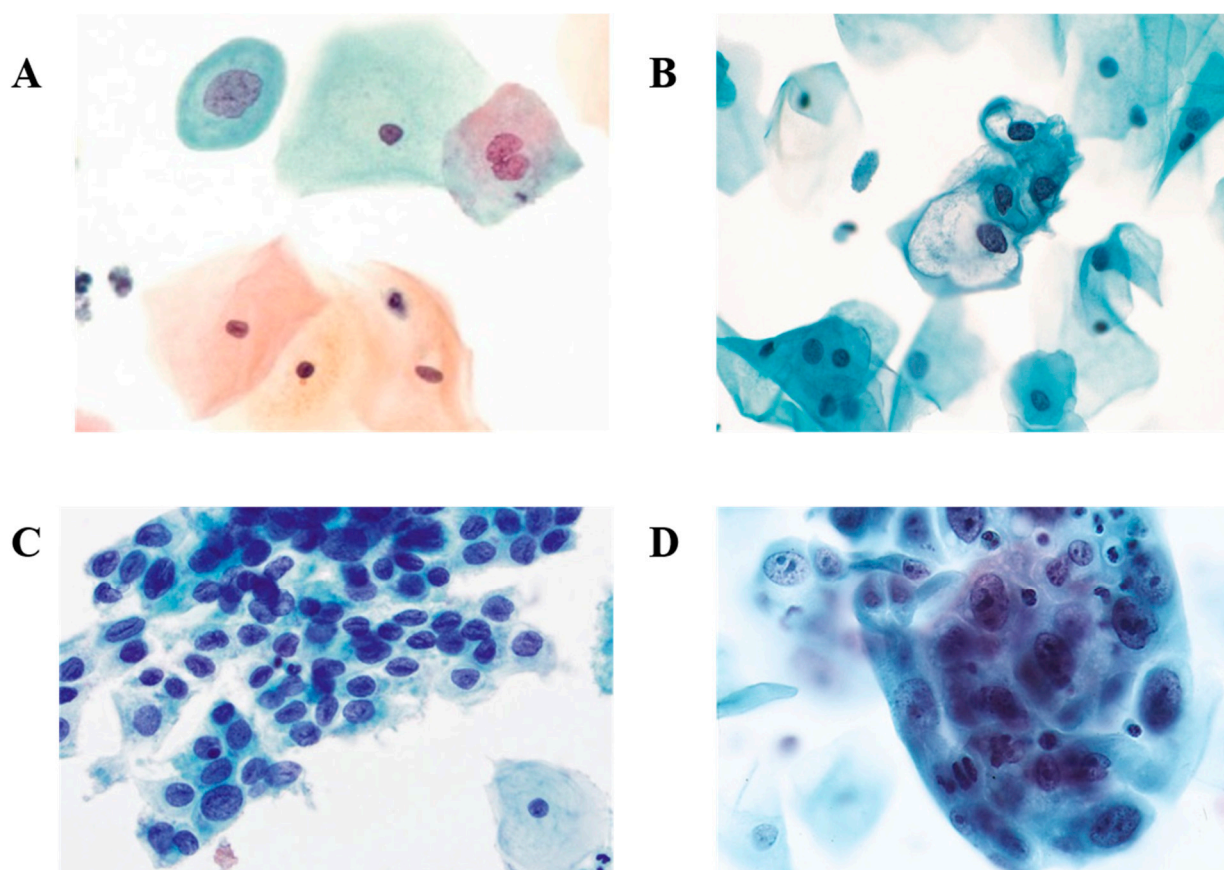

**Figure S1.** Cytology: (A) chronic cervicitis with HPV infection; (B) LSIL, (C) HSIL and (D) cervical cancer.

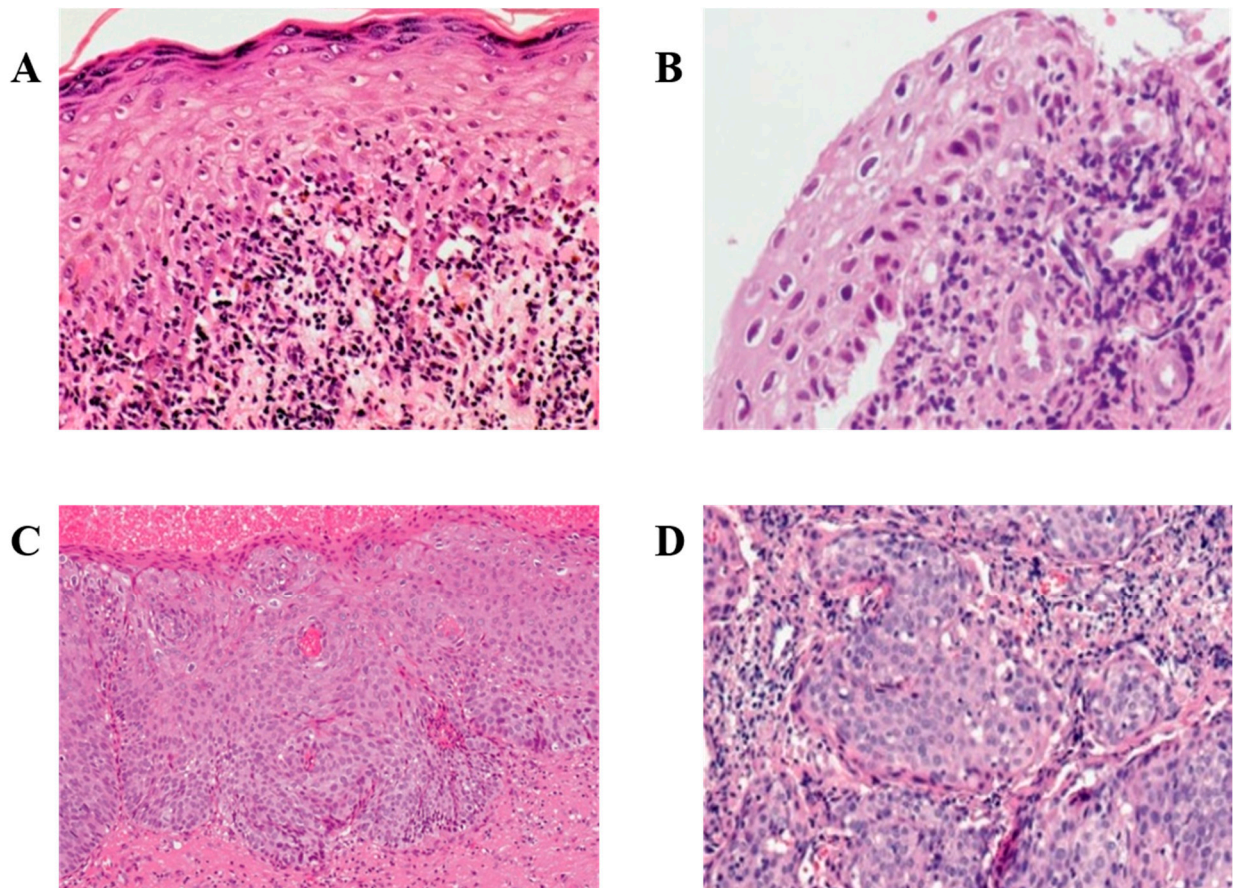

**Figure S2.** Hystology: (A) chronic cervicitis with HPV infection; (B) LSIL, (C) HSIL and (D) cervical cancer.

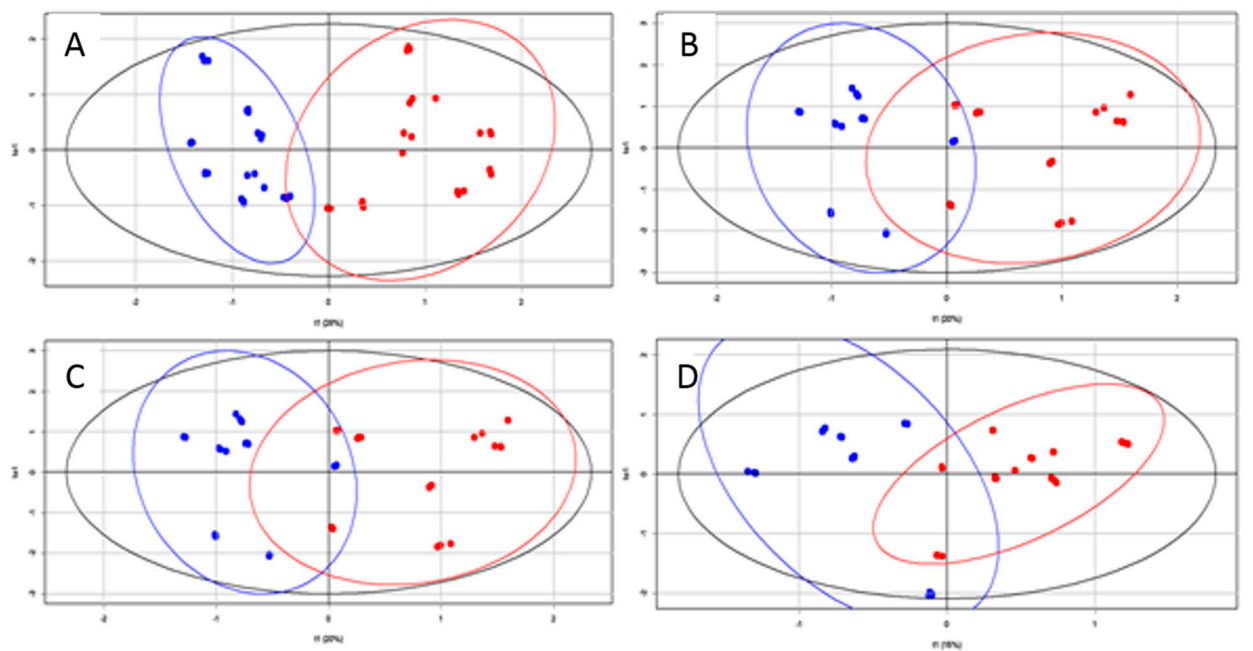

**Figure S3.** OPLS-DA score plots of ESI-MS data for damaged and surrounding tissues from patients with (A) chronic cervicitis; (B) LSIL; (C)
