# Supplementary material for: Shotgun Lipidomics for Differential Diagnosis of HPV-Associated Cervix Transformation
Source: Metabolites. 2022 May 31;12(6):503. doi: 10.3390/metabo12060503 (PMC9229224; doi:10.3390/metabo12060503)
Supplement: Supplementary file 1 [file metabolites-12-00503-s001.zip › Supplementary2.xlsx]

## Sheet: Supplementary2_22051901
Table S1. The abundance-m/z table after FIA ESI-MS analysis in positive ion mode. Each peak abundance was normalized on TIC.
	Diagnosis	Tissue	X400.3447	X401.3302	X407.3339	X408.3121	X408.9548	X409.3239	X411.355	X412.3563	X413.3703	X414.3726	X419.293	X420.2979	X421.3366	X423.3367	X424.3518	X425.2102	X425.3642	X426.3547	X427.3678	X428.3688	X429.3656	X430.3708	X431.3575	X432.2496	X432.9986	X437.2014	X439.3468	X441.3066	X443.3353	X445.3594	X447.3397	X448.342	X449.3552	X451.3489	X452.3757	X453.3528	X455.3265	X457.3477	X458.3425	X459.3415	X460.2705	X461.3535	X462.3554	X463.2987	X464.3669	X465.365	X467.3444
1	cervicit	-1	0.00418518	0.00372781	0.00235847	0.00260644	0.00323463	0.00238602	0.00562065	0.00176885	0.00996288	0.00324014	0.00515502	0.00181845	0.00288196	0.00236398	0.00404466	0.00301146	0.00408324	0.00245766	0.00403915	0.00376914	0.0161897	0.0055132	0.00354597	0.00323738	0.0111366	0.00267256	0.00323738	0.00489327	0.00324841	0.00453509	0.0256676	0.00790197	0.00383802	0.00325943	0.00312442	0.00435876	0.00280206	0.00328973	0.00668417	0.00310238	0.00213805	0.00875609	0.00225377	0.00661804	0.00343576	0.00239153	0.00260093
2	cervicit	-1	0.00428379	0.00373813	0.00235364	0.00258982	0.00320062	0.00225319	0.00566556	0.00180799	0.00966702	0.00328478	0.00516335	0.00189214	0.00280971	0.00242151	0.00390373	0.00308932	0.00414262	0.00256538	0.00406933	0.00400689	0.0160167	0.00538052	0.00354267	0.00322777	0.0109158	0.00260339	0.00327663	0.0048783	0.00329835	0.00446839	0.025738	0.00799477	0.00377071	0.00314362	0.00309475	0.00427021	0.00281785	0.00321691	0.00686274	0.00314904	0.00214732	0.00863001	0.00225863	0.00672972	0.00336079	0.00251109	0.00257081
3	cervicit	-1	0.00420943	0.00360808	0.00231712	0.00256538	0.0032881	0.00220678	0.00564384	0.00180956	0.00987534	0.00334051	0.00504249	0	0.00290467	0.00243573	0.00396944	0.00298467	0.00404668	0.00247159	0.00398875	0.00379566	0.0161095	0.00536799	0.00353636	0.00320535	0.0113401	0.00264538	0.00334051	0.00479423	0.00329086	0.00448252	0.0256621	0.00800233	0.00367153	0.00311983	0.00310052	0.00429494	0.00286605	0.00316673	0.00690446	0.00315293	0.00208265	0.00851265	0.00226471	0.00667826	0.00337913	0.00245504	0.00251297
4	cervicit	-1	0.00314898	0.00244832	0.00153453	0.00269608	0.00397219	0.00215527	0.00622869	0.00219789	0.010406	0.00358589	0.00502718	0.00151055	0.00244566	0.00195546	0.00208334	0.00362319	0.00299446	0.0030211	0.00558931	0.00303176	0.0153613	0.00542147	0.00512309	0.00176897	0.0137228	0.00215527	0.00529093	0.00467552	0.00352728	0.0048993	0.0290548	0.00903933	0.00404679	0.00350331	0.00145194	0.00807226	0.00407609	0.0031996	0.00513374	0.00276801	0	0.0141677	0.00320493	0.00699063	0.00295184	0.00194747	0.00307438
5	cervicit	-1	0.00312754	0.00245368	0.00155348	0.00271088	0.00400459	0.00218362	0.00629366	0.00208588	0.01045	0.00353906	0.00501795	0.00148147	0.00247168	0.00194442	0.00201901	0.00363422	0.0029475	0.00298351	0.00560179	0.00306581	0.0153548	0.00532402	0.00518256	0.00174895	0.0145317	0.00206016	0.00517742	0.00456014	0.00347219	0.00479676	0.0288191	0.00885022	0.00408175	0.0036085	0	0.00790372	0.00416405	0.00308382	0.00502567	0.00270316	0	0.0143466	0.00310954	0.00700867	0.00295522	0.001947	0.00313783
6	cervicit	-1	0.00306922	0.00239256	0	0.00270663	0.00396802	0.00217041	0.0063325	0.00212956	0.0104971	0.00355948	0.0048464	0	0.00247682	0.00193039	0.00206317	0.00370757	0.00284962	0.00295942	0.00562264	0.00308454	0.0153716	0.00531879	0.00515537	0.00179761	0.0140004	0.00209636	0.00523963	0.00459872	0.00350585	0.00485406	0.0291346	0.00871484	0.00400122	0.00349309	0	0.0081965	0.00423613	0.00315093	0.00500727	0.0027194	0	0.0142302	0.00317135	0.00699383	0.00291346	0.0019023	0.00312029
7	cervicit	-1	0.00650053	0.00221976	0	0	0.00578178	0	0.00440777	0	0.00728567	0.00246512	0.00923121	0.00279707	0.00580487	0.00226306	0.0025546	0.00616569	0.00413644	0	0.00417108	0.00343789	0.0134254	0.00721062	0.00302223	0.00253151	0.0227605	0.00324449	0.00234677	0.00825844	0.00520735	0.00372366	0.0237391	0.00782835	0.00495622	0.00434716	0	0.00265563	0.0047253	0.00357645	0.00581642	0.00269893	0	0.00537188	0	0.0114567	0	0.00263254	0.00314635
8	cervicit	-1	0.00494331	0.00256209	0	0	0.00522948	0	0.00549406	0	0.00921166	0.00318574	0.0100567	0.00295086	0.00577484	0.0024865	0.00305886	0.00675216	0.00474622	0	0.00449244	0.00333963	0.0158909	0.00653348	0.00292657	0.00280238	0.0194546	0.00343413	0.00264039	0.00867441	0.00545626	0.00458423	0.0289201	0.00939255	0.00527268	0.00480832	0	0.00292387	0.00511879	0.00398488	0.00657937	0.00310475	0	0.0062635	0	0.0122678	0	0.00279428	0.00349892
9	cervicit	-1	0	0.00266871	0.00226853	0	0.00577513	0	0.00552502	0	0.0094518	0.00317645	0.0113852	0.00333652	0.00625535	0.00267372	0.00323397	0.00758345	0.00493475	0	0.00441701	0.00331401	0.0164575	0.0063779	0.00291633	0.00296885	0.020857	0.00381174	0.00277876	0.00978946	0.00589518	0.00475466	0.0293934	0.00969191	0.00547999	0.00525989	0	0.00318145	0.00560755	0.00437699	0.00719828	0.00339405	0.00235857	0.00631287	0	0.0138838	0	0.00295385	0.00379423
10	cervicit	-1	0.00379328	0.00246624	0.00178757	0.00182998	0.00358725	0.00182998	0.0054445	0.00178757	0.00864395	0.002951	0.00725328	0.00212993	0.00420836	0.00179363	0.00206631	0.00276921	0.00276012	0.00194815	0.00788953	0.00415382	0.0144157	0.00508093	0.00260864	0.00205419	0.0146065	0.00344182	0.00245412	0.00592624	0.00349333	0.00418412	0.0211902	0.00696545	0.005902	0.00392356	0.002239	0.00239655	0.0031752	0.0038872	0.00431137	0.00232384	0	0.00463253	0	0.00966801	0	0.00181181	0.00332366
11	cervicit	-1	0.00377052	0.00260848	0.00173389	0.00179199	0.00365432	0.00180422	0.00558698	0.00188679	0.00914956	0.00302743	0.00742178	0.00222011	0.00407632	0.00178893	0.00212837	0.00272163	0.0028837	0.0019877	0.00774593	0.00412525	0.0148069	0.00512216	0.00267576	0.00205804	0.0144338	0.00362374	0.00249228	0.00594782	0.00366655	0.00426592	0.0215742	0.00706094	0.0059784	0.00405798	0.00220177	0.00240359	0.00320785	0.00403657	0.00434237	0.00236995	0	0.0046604	0	0.0101312	0	0.00188067	0.00344332
12	cervicit	-1	0.00392796	0.00273466	0.00173713	0.001849	0.00344629	0.00197641	0.00584223	0.00200749	0.00939417	0.00319458	0.0072686	0.00215976	0.0041051	0.00179928	0.00209761	0.0027502	0.00285896	0.00202303	0.00824437	0.00441585	0.0150686	0.00527043	0.00274709	0.00204478	0.0143041	0.0036141	0.00250781	0.00570549	0.0036949	0.00441585	0.022446	0.00726549	0.0057925	0.00391243	0.00232757	0.00239283	0.00309824	0.0039839	0.0044749	0.00246741	0	0.00483848	0.00162526	0.00974222	0	0.00186765	0.00346494
13	cervicit	-1	0.00480485	0.00228087	0.00206637	0.0021057	0	0.00222725	0.0074039	0.00240957	0.0166418	0.00526245	0.00905556	0.00304951	0.00520168	0.00244532	0.00268843	0.0071894	0.00659952	0.00208782	0.0078329	0.00295655	0.0211785	0.00710002	0.00430792	0.00515163	0.00351783	0.00930224	0.0028493	0.00821543	0.00449025	0.00638144	0.0313316	0.0097241	0.00497287	0.00410057	0.0023917	0.00302805	0.00373591	0.00384674	0.00265268	0.00251682	0.00233807	0.00663884	0.00230232	0.00335338	0.00332478	0.00237025	0.00346778
14	cervicit	-1	0.00470713	0.0023447	0.00203964	0.0021496	0	0.00225956	0.00743493	0.00244757	0.0163597	0.00527468	0.0089886	0.00292644	0.00515762	0.00243692	0.00266749	0.00719017	0.00644881	0.00208575	0.00765485	0.00295836	0.0213506	0.00737462	0.00433822	0.00509732	0.0036075	0.00933268	0.00285195	0.0082969	0.00446947	0.00643462	0.0313501	0.00981155	0.00495189	0.00416796	0.002217	0.00298674	0.00362524	0.00375294	0.00253625	0.00244402	0.00241564	0.00666518	0.00229504	0.00328825	0.00323859	0.00235179	0.00338403
15	cervicit	-1	0.00478234	0.00236384	0	0.0020769	0	0.00226136	0.00752877	0.00249706	0.016868	0.00542112	0.00933581	0.0028899	0.00514443	0.00236726	0.0026337	0.00710861	0.00641517	0	0.00770298	0.00291723	0.0215684	0.00705395	0.00444074	0.00512052	0.00354576	0.00935972	0.00283183	0.00812656	0.00454322	0.00640492	0.0310032	0.00970473	0.0049463	0.00414356	0.0021828	0.00306411	0.00366191	0.00382246	0.00254147	0.00250048	0.00238092	0.0067431	0.00231943	0.0032759	0.00319733	0.00236384	0.00335789
16	cervicit	-1	0.00292647	0.00305899	0.00906654	0.00704193	0.00735483	0	0.0162888	0.00539649	0.0105647	0.00355962	0.00974754	0.0028823	0.00613639	0.0163956	0.00603699	0.0125341	0.0150888	0.00485536	0.00686524	0.00390932	0.0223884	0.008334	0.00319151	0.00406761	0.0273064	0.010285	0.017938	0	0.00830823	0.00863953	0.0196975	0.0063094	0.00553269	0.00808	0.00282708	0.00888616	0.0125415	0.0127734	0.0049658	0.00535967	0	0.00691678	0.00253995	0	0.00392037	0.00464554	0.00613639
17	cervicit	-1	0.0029723	0.00313296	0.00960163	0.0073944	0.00734849	0	0.0172714	0.00591016	0.0112503	0.00381005	0.0104049	0.00307941	0.00665611	0.017566	0.00634625	0.0128914	0.0156839	0.00516422	0.00708072	0.00380622	0.0236521	0.00853818	0.00336248	0.00416963	0.0266053	0.010688	0.0187901	0	0.00877918	0.00916554	0.0209247	0.00676704	0.0057954	0.00864911	0.00304115	0.00910433	0.0130942	0.0133505	0.00524073	0.00574567	0	0.00734467	0.00272747	0	0.00420023	0.00485819	0.00628505
18	cervicit	-1	0.00305089	0.00327324	0.0096812	0.0076983	0.00784775	0	0.0176091	0.00598514	0.011675	0.00379083	0.0107383	0.0030436	0.00668863	0.0175435	0.00648086	0.0136506	0.0158705	0.0050994	0.00719164	0.00385644	0.023926	0.00895584	0.00338623	0.00416991	0.0281068	0.0111137	0.0191838	0	0.0089121	0.00952446	0.0213781	0.00697294	0.00598514	0.00895948	0.00317118	0.00950988	0.0136361	0.0136069	0.00522697	0.00570812	0	0.00749054	0.00275564	0	0.00427198	0.00503014	0.00662667
19	cervicit	-1	0.00352286	0.00293962	0.00152403	0.00514654	0.00180832	0.00279895	0.00517878	0.00182005	0.00829426	0.00279601	0.00615182	0.00190211	0.00405041	0.00184349	0.00231536	0.00192849	0.0048095	0.00153283	0.00745604	0.0026905	0.0171747	0.00648593	0.00392438	0.161756	0.00898007	0.081231	0.00377491	0.00404748	0.00249414	0.00489449	0.0396219	0.0121073	0.00459848	0.00243259	0.00184643	0.00600821	0.00285463	0.00252931	0.00570926	0	0.00928488	0.0123476	0.00313013	0.00389801	0.010466	0.00443435	0.00189625
20	cervicit	-1	0.00350881	0.00289883	0.00157533	0.00510372	0.00194747	0.00270576	0.00511772	0.00182156	0.00824599	0.00275053	0.00609145	0.00197825	0.00404325	0.0019027	0.00224127	0.0019027	0.00481272	0.0016173	0.0077899	0.00275892	0.0170656	0.00629571	0.00412159	0.165488	0.00924211	0.0848103	0.00390334	0.00419435	0.00244833	0.00489947	0.0394671	0.0123984	0.00462525	0.00237279	0.00188032	0.00636007	0.0027841	0.00243154	0.00595714	0	0.00966742	0.0127034	0.0032374	0.00405724	0.0102494	0.00444617	0.00193628
21	cervicit	-1	0.00358899	0.002909	0.00155466	0.00513801	0.00191864	0.00276228	0.00525087	0.00178603	0.00818527	0.00278485	0.0062243	0.00195814	0.00395861	0.00191582	0.00230237	0.00189607	0.00493486	0.00159981	0.007731	0.00272842	0.0171972	0.00629766	0.00418433	0.169351	0.00924052	0.0844146	0.00397554	0.00426052	0.00244063	0.00504772	0.0403169	0.0123781	0.00466682	0.00231083	0.00190736	0.00633716	0.00270585	0.00245756	0.00593933	0	0.00979072	0.0129706	0.0032758	0.00399811	0.0102676	0.00450035	0.00189325
22	cervicit	-1	0.00288015	0	0	0.00343572	0.0334751	0.00211504	0.00448836	0	0.00593575	0.00204194	0.00579442	0	0.00211016	0.00198346	0	0.00566284	0.00237332	0.00254877	0.00392305	0.00226611	0.0150294	0.00596986	0.00214428	0	0.107336	0.00305559	0.00228073	0.0202244	0.00291427	0.00305559	0.0239915	0.00796307	0.00602834	0.00545329	0	0.00297762	0.00654492	0.00393767	0.00244642	0	0	0.00424469	0	0.00737339	0.00450298	0.00258775	0.00328952
23	cervicit	-1	0.00288938	0	0	0.00358412	0.0324641	0.00210722	0.00441228	0	0.00620664	0.00207041	0.00576495	0	0.00213483	0.0019968	0	0.0054889	0.00241088	0.00257652	0.00389238	0.00232346	0.0150358	0.00594899	0.00216703	0	0.0968171	0.00287558	0.00230506	0.0198714	0.00273295	0.0029998	0.0246149	0.00822644	0.00625725	0.00538308	0.00191398	0.00311022	0.00656551	0.00394299	0.0025029	0	0	0.00436167	0	0.00739828	0.00462852	0.00263173	0.00339088
24	cervicit	-1	0.0029815	0	0	0.00354726	0.0349742	0.00209244	0.00447224	0	0.00607525	0.00207896	0.00573848	0	0.00203855	0	0	0.00552295	0.00245614	0.0026582	0.00410405	0.00226755	0.0152263	0.00579686	0.00211938	0	0.104128	0.00282883	0.00222714	0.0196896	0.00281087	0.00295456	0.0242067	0.00786235	0.00610668	0.00543315	0	0.00315212	0.00656468	0.00396036	0.00250554	0	0	0.00420732	0	0.00749864	0.00448572	0.00261779	0.00339909
25	cervicit	1	0.00362228	0.02929	0.00273015	0.00708333	0.00610252	0.0033885	0.0066722	0.00217391	0.010144	0	0.0102327	0.00319234	0.00369752	0.00323265	0.00488256	0.0111302	0.00519695	0.00340731	0.00553285	0.00261997	0.0163191	0.00608371	0.00336432	0.00215778	0.0197559	0.00257698	0.00335088	0.0147874	0.0037647	0.00505991	0.0429085	0.0134868	0.00891866	0.00516202	0.00614283	0.00336163	0.00680656	0.00672594	0.00881117	0.00396355	0.00262535	0.00908258	0.00285913	0.0116811	0.00457891	0.0026979	0.00389906
26	cervicit	1	0.00365974	0.0292496	0.0027519	0.00681398	0.00536969	0.00335541	0.00672629	0.00220513	0.0101694	0	0.0100043	0.00325998	0.00367006	0.00307687	0.00495703	0.0109534	0.00513241	0.00353079	0.00556828	0.00254815	0.0165166	0.00614084	0.00350242	0.00216387	0.0173109	0.00248367	0.00333478	0.0142856	0.00373454	0.00505504	0.0420548	0.0131973	0.00880763	0.00512209	0.00618984	0.00344052	0.00665408	0.00680625	0.00904491	0.0039486	0.00255589	0.00895464	0.00291438	0.0114074	0.00439479	0.00265647	0.00372164
27	cervicit	1	0.00376391	0.0318792	0.00289856	0.00694514	0.00576241	0.00332256	0.00678645	0.0021795	0.010476	0	0.0106644	0.00329032	0.00373912	0.0032209	0.00505326	0.0114405	0.00524419	0.00355811	0.00556652	0.0025911	0.0169426	0.00601284	0.00339942	0.00217702	0.0186559	0.00255143	0.00327545	0.0144333	0.00387797	0.00511773	0.0435627	0.0135059	0.0089114	0.00524667	0.00630046	0.00353828	0.00665255	0.00688563	0.00927837	0.00412592	0.00263573	0.00917918	0.00284153	0.0121422	0.00445818	0.00277458	0.00391764
28	cervicit	1	0.00392897	0.00243195	0.00168626	0.00555309	0.00738624	0.00212125	0.00386118	0	0	0	0.00803024	0.00238111	0.00414081	0.00236698	0.00283586	0.00599373	0.00608694	0.0029319	0.0133913	0.00411257	0.0124111	0.00460404	0.00187551	0.00180207	0.0256668	0.00217209	0.0034262	0.0114621	0.00317481	0.00344879	0.0375526	0.0122614	0.00991987	0.00286128	0.0043583	0.0020817	0.00545706	0.00588074	0.00628748	0.00282739	0.00231332	0.00650215	0.00228507	0.00849911	0.00418883	0.00251951	0.00227377
29	cervicit	1	0.00389603	0.00238881	0.00166932	0.00546013	0.00689911	0.00201342	0.00382209	0	0	0	0.00794848	0.0023234	0.00396997	0.00242862	0.00286941	0.00608009	0.00613128	0.00300876	0.0133148	0.00419748	0.0124417	0.00466102	0.00191105	0.00174042	0.0247299	0.00209305	0.00357184	0.0110738	0.00327324	0.00359174	0.0392134	0.0126948	0.00972018	0.00285804	0.00455011	0.00203902	0.00526675	0.00575874	0.00620237	0.0027841	0.0023234	0.00653794	0.00224093	0.00813048	0.0043482	0.00251678	0.00221534
30	cervicit	1	0.00387014	0.00246358	0.00171944	0.00541481	0.00700176	0	0.00394343	0	0	0	0.00788685	0.00231137	0.00405899	0.00248331	0.00293995	0.00591091	0.00611668	0.00296532	0.0135215	0.0041802	0.0129719	0.00472422	0.00183219	0.00182655	0.0252672	0.00222681	0.00360517	0.0111904	0.00326129	0.00351498	0.0389804	0.0126223	0.00963729	0.00291176	0.00453254	0.00205486	0.00527105	0.00567977	0.00624352	0.00288358	0.00226909	0.00673962	0.00229164	0.00828993	0.00430986	0.00256788	0.00226063
31	cervicit	1	0	0.00198759	0	0	0.0047111	0	0.0020803	0	0.00339281	0	0.00349421	0	0.00378395	0	0.00195861	0.00238163	0.00325953	0.00280754	0.00563246	0.00234106	0.011998	0.00512253	0.00177318	0.00261631	0.0202467	0.00181954	0	0.0021875	0.00258155	0.00314943	0.0113721	0.00386218	0.00338121	0	0	0	0.00155588	0.00143999	0.00313784	0.00150083	0.00191515	0.00301035	0	0.00446193	0.00214694	0.00161962	0.00149793
32	cervicit	1	0	0.00215927	0	0	0.00411748	0	0.00217967	0	0.00372409	0	0.00415536	0	0.00379111	0	0.00222338	0.00269836	0.00374449	0.00322288	0.00595913	0.00228749	0.0133986	0.00522189	0.00169303	0.00284698	0.014503	0.00212722	0	0.00236617	0.00321997	0.00353177	0.0117988	0.00413205	0.00314129	0.00142786	0	0	0.00163767	0.00178337	0.00340064	0.00161727	0.00211265	0.00291109	0	0.00528017	0	0.00177171	0.00161727
33	cervicit	1	0	0.00225941	0	0	0.00436995	0	0.00256884	0	0.00431157	0.00156466	0.00442541	0	0.00400798	0	0.00228568	0.00276151	0.00403425	0.0033716	0.00615062	0.00222146	0.0148818	0.00531575	0.00176024	0.00295709	0.0161049	0.00234407	0	0.00239077	0.00356719	0.00380072	0.0128822	0.00442541	0.00320813	0.00159969	0.0014946	0	0.00171645	0.0018157	0.00368979	0.00177776	0.00217476	0.00309721	0	0.00574486	0	0.00178651	0.00168726
34	cervicit	1	0.00467195	0.00267667	0.00170512	0.00355368	0.00834627	0.00191703	0.00579348	0.0020018	0.00887769	0.00287881	0.00828106	0.00242237	0.00516751	0.00229196	0.00253322	0.00487409	0.00313637	0.0032081	0.00841799	0.00293749	0.0177945	0.00642923	0.00302878	0	0.0328015	0.00172142	0.00257887	0.0113164	0.00321462	0.00460675	0.0274742	0.00899506	0.00912547	0.00559135	0.00199202	0.00331894	0.00525228	0.00417639	0.00386015	0.00243215	0.00171164	0.00559461	0.00186161	0.0100481	0.00408837	0.00245824	0.00393187
35	cervicit	1	0.00493305	0.00283081	0	0.00362998	0.00846995	0.00197707	0.00611416	0.00200917	0.00921778	0.00308757	0.00845391	0.00238468	0.00530857	0.00231728	0.00263503	0.0048817	0.00326409	0.00321274	0.00881017	0.00309078	0.0189523	0.00680742	0.00318707	0	0.0334562	0.00180376	0.00266391	0.0118817	0.00335717	0.00489775	0.0287478	0.00937825	0.00924345	0.00584777	0.00210224	0.00346629	0.00531499	0.0043425	0.0039413	0.00258367	0.00176845	0.00573864	0.00194177	0.0102641	0.00425584	0.0025259	0.00411783
36	cervicit	1	0.00507215	0.00289276	0	0.00363559	0.00836414	0.00212376	0.00640727	0.00210085	0.00961418	0.00320691	0.00813508	0.00234301	0.00552374	0.00233646	0.00270624	0.00479727	0.00350142	0.00343925	0.00896953	0.00303675	0.0200432	0.00704866	0.00321673	0	0.0333519	0.0018227	0.0026866	0.0120946	0.00342288	0.00505906	0.0292614	0.009624	0.00922477	0.00616839	0.00217284	0.00358323	0.00551719	0.00457148	0.00392355	0.00260807	0.00177034	0.0058837	0.00200595	0.010033	0.0041788	0.00246736	0.0042737
37	cervicit	1	0.00245071	0.00241284	0.0036363	0.00278404	0.00340145	0	0.00712487	0.00240905	0.0056552	0.00195072	0.00514006	0.00159088	0.00356433	0.00633701	0.00281056	0.00383705	0.00640898	0.00224238	0.00367418	0.00187497	0.0178444	0.00621201	0.00198102	0.00291662	0.015977	0.00489385	0.00738623	0	0.00432189	0.00684079	0.0123028	0.00414387	0.00218178	0.0028598	0.00153028	0.00362494	0.00531809	0.00567793	0.00286737	0.0027045	0.00192042	0.00384463	0	0.00324615	0.00256814	0.00204163	0.0024242
38	cervicit	1	0.00256335	0.00248126	0.00374615	0.00285812	0.00342526	0	0.00765274	0.00250738	0.0060222	0.00192904	0.00526476	0.00171263	0.00360809	0.00660427	0.00307453	0.00391405	0.00682068	0.00238052	0.00392525	0.00183576	0.018242	0.00661919	0.00208575	0.00299617	0.0161263	0.00489163	0.00776841	0	0.00443642	0.00714902	0.012466	0.00424986	0.00220515	0.0029514	0.00157831	0.00377973	0.00553714	0.00596623	0.00302975	0.00277976	0.00199247	0.00396256	0	0.00338795	0.00258574	0.00204471	0.00249246
39	cervicit	1	0.00239294	0.00243845	0.00383402	0.00287836	0.00354201	0	0.00744429	0.0025143	0.0058591	0.00197958	0.00531301	0.00166482	0.00366336	0.00660998	0.00296179	0.00397054	0.00700817	0.0024612	0.00397054	0.0018696	0.0186695	0.0066972	0.00208197	0.00304142	0.015666	0.00496791	0.00760356	0	0.0046797	0.00745187	0.0124084	0.00425875	0.00225263	0.00312486	0.00153967	0.00380747	0.00560123	0.00602217	0.002958	0.00282526	0.00185823	0.00386435	0.00148658	0.00326517	0.00259773	0.00207818	0.00250671
40	cervicit	1	0.0030488	0.00239135	0.00188038	0.00449316	0.00775997	0.00222784	0.00487128	0	0.00783151	0.00287507	0.00728647	0.00208818	0.00271497	0.00204389	0.00254124	0.015738	0.00331451	0.00290573	0.00403669	0.00222784	0.0147807	0.00548104	0.00300452	0	0.0322254	0	0.0028887	0.00583872	0.00400943	0.00393449	0.0324059	0.0115105	0.00579784	0.00437052	0	0.0033622	0.00476227	0.00353253	0.00450678	0.00242882	0.00206092	0.00750449	0.00231982	0.00732395	0.00846171	0.00516764	0.00312715
41	cervicit	1	0.00299749	0.00272266	0.00165213	0.00435562	0.00464003	0.00234239	0.00599817	0.00205478	0.00887742	0.00311253	0.00617073	0.00193015	0.00307418	0.00224013	0.00246701	0.0148884	0.00327231	0.00325314	0.00417986	0.00227847	0.0173266	0.00668842	0.00294316	0	0.0188509	0	0.00254371	0.00535585	0.00385711	0.00427893	0.036462	0.0118749	0.00533029	0.00425336	0.001601	0.00326911	0.00413513	0.00337137	0.00468477	0.00261082	0.00174161	0.00808491	0.0024031	0.00687696	0.0102547	0.00533668	0.00301027
42	cervicit	1	0.00309964	0.00292518	0.00185223	0.00431508	0.00525718	0.00243377	0.00628652	0.00220406	0.00944141	0.0031956	0.00662673	0.00202669	0.00327411	0.0024047	0.00259661	0.0161728	0.0034195	0.00348928	0.00450699	0.00233491	0.0185019	0.00682445	0.00309383	0	0.0209997	0	0.00277979	0.00574568	0.0042482	0.0045099	0.0384577	0.0123608	0.0056381	0.00451862	0.00170975	0.00343113	0.00464947	0.00358815	0.00497223	0.00282923	0.00182315	0.00845569	0.00258207	0.00754557	0.0102032	0.0055247	0.00322758
43	cervicit	1	0	0.00264893	0	0.00580404	0.00545312	0.00245018	0.00354329	0	0.00434138	0	0.006127	0.00196573	0.00461466	0.00213653	0.00226075	0.00928522	0.00428549	0.00197505	0.00643444	0.00266135	0.015701	0.00614874	0.00206511	0	0.0207535	0	0.00378551	0.00586925	0.00275141	0.00390352	0.0331069	0.0106951	0.00670772	0.00293152	0.00218622	0.00277935	0.0060711	0.00345013	0.00410848	0.00216759	0.00272656	0.00681641	0.00219864	0.0065866	0.00465193	0.00237565	0.00217069
44	cervicit	1	0	0.00266755	0	0.005868	0.00563962	0.00252138	0.00362373	0	0.00439111	0	0.00630955	0.00198544	0.00468953	0.00211333	0.00228691	0.0095435	0.00440024	0.00202198	0.00645267	0.00263406	0.015847	0.00623647	0.00208288	0	0.0215718	0	0.00377294	0.00595327	0.00285331	0.0039861	0.0335058	0.010923	0.00680896	0.00291421	0.00217728	0.00267364	0.00622429	0.00356892	0.00402873	0.00215901	0.00285635	0.00689422	0.00222296	0.00674501	0.00481743	0.00235695	0.00217728
45	cervicit	1	0	0.00273588	0	0.00571593	0.00586931	0.0025418	0.00373132	0	0.00442311	0	0.00592566	0.00190322	0.00469232	0.00217869	0.00231329	0.00913109	0.00433234	0.00204096	0.00656424	0.00267015	0.0160991	0.00620425	0.00206287	0	0.0237527	0	0.00373132	0.00584427	0.00274527	0.00395983	0.0330372	0.0108434	0.0068491	0.00286735	0.00207226	0.00277658	0.00610722	0.00350594	0.00399113	0.00217243	0.00260754	0.00688353	0.00229764	0.00635138	0.00477684	0.00234773	0.00219434
46	cervicit	1	0.00374513	0.00226416	0	0.00390177	0.00917058	0	0.00441797	0.00149876	0.00471345	0	0.00635817	0.00200784	0.00231044	0.0022072	0.00208972	0.00573161	0.00303668	0.00304736	0.00500181	0.0019936	0.0184337	0.00658957	0.001958	0	0.038918	0	0.00337133	0.0119474	0.00267001	0.00433253	0.042891	0.0143361	0.00548241	0.00264864	0.00144536	0.0017266	0.00556785	0.00295837	0.00419725	0.00229264	0.00154148	0.00690285	0.00240656	0.00694201	0.00691353	0.00299753	0.00200428
47	cervicit	1	0.00382951	0.00228089	0	0.00400819	0.00847887	0	0.00441812	0.00153811	0.00465287	0	0.00656236	0.00202512	0.00236497	0.00225636	0.00212322	0.00575652	0.00299914	0.00316381	0.00501375	0.00203563	0.0185274	0.00668149	0.00205315	0	0.0345496	0	0.00351067	0.0121087	0.00266629	0.00449871	0.0447313	0.0147609	0.00566192	0.00275038	0.00150307	0.00176585	0.00586864	0.00297461	0.00446017	0.00234746	0.00159066	0.00701784	0.00254016	0.00702835	0.00690222	0.00303417	0.00204964
48	cervicit	1	0.00384483	0.00225154	0	0.00402374	0.00888463	0	0.00458746	0.00152578	0.00495541	0	0.00654532	0.00214352	0.00224816	0.00225154	0.00218065	0.00578243	0.00306169	0.00326422	0.00504655	0.00197136	0.0194436	0.00689639	0.00207938	0	0.0362913	0	0.00356128	0.0120611	0.00271737	0.00455033	0.0455236	0.0148932	0.00564403	0.00283214	0.00155953	0.00176545	0.00573855	0.0029908	0.00445582	0.00236968	0.0016203	0.00731496	0.00253171	0.00717994	0.00673436	0.00293341	0.0020625
49	cancer	-1	0.00907029	0.025837	0.00939526	0.00668977	0	0	0.00529474	0.00186531	0.00821689	0	0.0182568	0.00518378	0.00723404	0.00334488	0.0164232	0.667087	0.0184761	0.00563293	0.0194061	0.0060266	0.0139687	0.00493806	0.00257603	0.00464215	0.0033211	0.00668977	0.00270286	0.0128141	0.00281382	0.00418507	0.00552461	0.00187324	0.00535551	0.00428018	0.011213	0.00347699	0.00219029	0.00711514	0.00541892	0.00280061	0.00579674	0.00239373	0	0.00349284	0.00157204	0	0.00175963
50	cancer	-1	0.00940046	0.0271222	0.0095741	0.00709509	0	0	0.0056686	0.00195008	0.00878338	0	0.0185204	0.00540947	0.0073836	0.00346741	0.0169737	0.655543	0.0189612	0.0056312	0.0196371	0.00613074	0.0144653	0.00507556	0.0027034	0.00473362	0.00378262	0.0068707	0.00281293	0.0134636	0.00298122	0.00439169	0.00567394	0.00200351	0.00533735	0.00438902	0.0115963	0.0036544	0.00227332	0.00731147	0.00552969	0.00291711	0.00608265	0.00244962	0	0.00379064	0.00163754	0	0.00189398
51	cancer	-1	0.009555	0.0279307	0.0100136	0.00709873	0	0	0.00590576	0.00204268	0.00896977	0	0.0187499	0.00558501	0.00780494	0.0036183	0.0171742	0.673977	0.0191466	0.00577352	0.0195095	0.00607457	0.0148024	0.00510669	0.00268418	0.00470997	0.00426261	0.00724785	0.0027911	0.0139358	0.00308371	0.0043639	0.00575382	0.00201454	0.00535992	0.00458618	0.0121407	0.00370552	0.00231841	0.00737164	0.0056666	0.00292896	0.00618149	0.0025238	0	0.00388278	0.0016741	0	0.00195264
52	cancer	-1	0.00357808	0.00340374	0	0.00545014	0.0117886	0.00244488	0.00555391	0.00204224	0.008032	0.00269809	0.0160806	0.00444147	0.00498524	0	0.0027562	0.00328336	0.00383543	0.00395166	0.00949727	0.00316714	0.0230334	0.00852181	0.00267318	0.00378147	0.0448422	0.0102154	0.00224149	0.0225519	0.00350336	0.0050724	0.00514297	0.00204224	0.00509731	0.00279771	0	0.00294299	0.00219583	0.00312978	0.00494373	0.00269809	0	0.0022996	0	0.0057324	0	0	0.00219168
53	cancer	-1	0.00368513	0.00344685	0	0.00540651	0.0115854	0.00238691	0.00564479	0.00198019	0.00812208	0.00271147	0.0162976	0.00449036	0.00499568	0	0.00269093	0.00324555	0.00370157	0.00400969	0.00952712	0.00319625	0.0235241	0.00876298	0.00259644	0.0038166	0.0440408	0.0101721	0.0021322	0.0225545	0.00348794	0.00536542	0.00470399	0.00193089	0.00509838	0.00272379	0.00185284	0.00288402	0.00220204	0.00306478	0.00498335	0.00275666	0	0.00221848	0	0.00566122	0	0	0.00215274
54	cancer	-1	0.00361394	0.00347527	0.00180697	0.00536024	0.0117041	0.00239196	0.00542957	0.00189364	0.00816819	0.00272995	0.0164274	0.00451959	0.00491825	0	0.00264329	0.00315461	0.00366161	0.00386527	0.00918218	0.00315461	0.0233433	0.00856252	0.00265196	0.00375694	0.0438569	0.0100358	0.0021493	0.0228536	0.00349694	0.00521724	0.00473625	0.0019023	0.00514791	0.00289895	0.00188497	0.00291195	0.00222296	0.00312428	0.00492692	0.00269962	0	0.00215796	0	0.00542957	0	0	0.00217963
55	cancer	-1	0.00877785	0.00649599	0.00511035	0.00919736	0.00275857	0.00386772	0.0116381	0.0038995	0.0351591	0.0115046	0.00486882	0.00166849	0.0117621	0.00247255	0.0054218	0	0.0068424	0.00167485	0.0121371	0.00371835	0.0364113	0.011743	0.00798969	0.0119146	0.00973128	0.0271344	0.0045955	0.0055235	0.00678838	0.00998235	0.0611176	0.0195897	0.0106497	0.00814859	0.00889544	0.00622586	0.00643561	0.00949928	0.00406159	0.00409337	0	0.010637	0.00393764	0	0.00656591	0.00415057	0.00596525
56	cancer	-1	0.00855432	0.00637888	0.00495868	0.00947505	0	0.00373105	0.0111179	0.00389654	0.0338622	0.0113015	0.00457956	0.00150144	0.0121921	0.00264182	0.00542807	0	0.00663163	0.00164888	0.0121801	0.00358662	0.0356194	0.0119424	0.00776599	0.0118822	0.0120868	0.0280761	0.00457956	0.00553338	0.00667977	0.00977594	0.0601781	0.0193954	0.0104289	0.00823237	0.00842193	0.0062495	0.00639995	0.00963151	0.00415831	0.00395972	0.00148038	0.0104319	0.0037822	0	0.00669482	0	0.00591852
57	cancer	-1	0.00269394	0.00346201	0.00477459	0.0031009	0	0.00248473	0.0070673	0.00238443	0.0196199	0.00648839	0.00339322	0.00119221	0.00308657	0.00213796	0.00777232	0	0.0101969	0.00327285	0.00662882	0.00174533	0.0230332	0.0076978	0.00494654	0.00474306	0	0.00498093	0.0029748	0.00371707	0.00350499	0.00627059	0.026286	0.00884416	0.00461696	0	0.00412403	0	0.00275699	0.00389762	0.00170521	0.00216662	0.00236437	0.00517295	0.00187716	0.00189722	0.00348207	0.00337603	0.00256785
58	cancer	-1	0.00309273	0.00328341	0.00445625	0.00276883	0	0.00239791	0.00644667	0.00213409	0.0173653	0.00594776	0.00326774	0.00113627	0.00375882	0.00180496	0.00681759	0	0.0100017	0.00328864	0.00643361	0.00248411	0.0213696	0.00719896	0.00425251	0.00444841	0.00393122	0.0076404	0.00294906	0.00354724	0.00329386	0.00571528	0.0260427	0.00857554	0.00510666	0	0.00370135	0	0.00280017	0.00414541	0.00178929	0.00184676	0.00212103	0.00491337	0.00178407	0.00161167	0.00339312	0.00313975	0.00276883
59	cancer	-1	0.00291935	0.00324315	0.00448738	0.00274597	0	0.00238647	0.00646081	0.00219525	0.0173045	0.00571376	0.00318196	0.00112694	0.00379897	0.00170571	0.00673107	0	0.00991813	0.00337063	0.00639961	0.00257769	0.0212717	0.00727414	0.00427066	0.00447973	0.00428596	0.0079447	0.00303918	0.00357206	0.00337573	0.0057418	0.026292	0.00859486	0.00511969	0	0.00362305	0	0.0029066	0.00424771	0.0017975	0.00232273	0.0021417	0.00490297	0.00174906	0	0.00342927	0.00306213	0.00269753
60	cancer	-1	0.00629193	0.00485846	0.00508865	0.00375284	0	0.0034215	0.00934024	0.00308319	0.0245295	0.00817533	0.00475383	0.00160437	0.00495612	0.00258792	0.00539557	0	0.00774982	0.00194269	0.00784399	0.00246585	0.026793	0.00885195	0.00595013	0.00420625	0.00721968	0.00823462	0.00395164	0.00495263	0.00487241	0.00759984	0.0339569	0.0110179	0.00651515	0.00621869	0.00423764	0.00394466	0.00433529	0.00545487	0.00216242	0.00280416	0.00187991	0.00654654	0.00236819	0.00202988	0.00417486	0	0.00412603
61	cancer	-1	0.00604273	0.00460618	0.00505428	0.003509	0.0022339	0.00334755	0.00908387	0.00308397	0.0238381	0.00790432	0.00462925	0.00161118	0.00501145	0.00248431	0.00544966	0	0.00761766	0.00177592	0.00765391	0.00239864	0.026708	0.00896525	0.0056803	0.00406912	0.00858305	0.00853033	0.00395381	0.00488954	0.00467537	0.00752211	0.0328133	0.010784	0.00658638	0.00634256	0.00398675	0.00398675	0.00428329	0.00536729	0.00206916	0.00263587	0.00182534	0.00640187	0.00236569	0.00205927	0.00411855	0	0.00428658
62	cancer	-1	0.00476934	0.00738398	0.00483978	0.00673343	0.00792265	0.00459531	0.00875553	0.00293785	0	0	0	0.00144199	0.00871823	0.00405249	0.00399033	0	0.00657597	0.00410221	0.00926934	0.00598757	0.0287155	0.00967956	0.00545304	0.00320304	0.0273812	0.00807597	0.00437569	0	0.00650967	0.00723895	0.0459738	0.0150995	0.0100111	0.00790194	0.00442127	0.00531216	0	0.00754144	0.00305387	0.0030663	0.00164088	0.00816298	0.00299586	0	0.00610774	0	0.00521685
63	cancer	-1	0.00506967	0.00732655	0.00495766	0.00706933	0.00812309	0.00458013	0.00865827	0.00297459	0	0	0	0.00142714	0.00881177	0.00412377	0.00409059	0	0.00650926	0.00412377	0.00893208	0.00615247	0.0286797	0.0098199	0.00544305	0.00319862	0.0272484	0.00839275	0.00445567	0	0.00688679	0.00718964	0.0467804	0.0153874	0.010438	0.00806086	0.00460087	0.00553432	0	0.00789906	0.0031198	0.00308246	0.00163458	0.00832223	0.00298704	0	0.00627693	0	0.00531859
64	cancer	-1	0.00521061	0.00741221	0.00493593	0.00732065	0.0081988	0.00460714	0.00870238	0.00294657	0	0	0	0.00145664	0.00911024	0.00413686	0.00405778	0	0.00663811	0.00449477	0.00922677	0.00615534	0.0287832	0.00984688	0.00541038	0.00327952	0.0272142	0.00849845	0.00442402	0	0.00697522	0.00729152	0.0475156	0.0154154	0.0104753	0.00824042	0.00456969	0.00558101	0	0.00798655	0.00320877	0.0031505	0.00175629	0.00853591	0.003009	0	0.00643835	0	0.00533546
65	cancer	1	0.00640956	0.00493688	0.00351608	0.00856072	0.0050606	0.00365976	0.0101132	0.00346819	0.0262449	0.00868843	0	0.00144475	0.0138847	0.00223497	0.00208331	0	0.0049289	0.00350012	0.0178598	0.0055076	0.0339555	0.0114063	0.00652131	0.00554351	0.0206734	0.0192447	0.0051963	0	0.00716786	0.0088361	0.0595778	0.0192846	0.0148625	0.0069284	0.00381541	0.00548365	0.00650535	0.0074153	0.00350012	0.00372761	0.00166026	0.0104565	0.00382738	0	0.00772261	0.00429832	0.0049289
66	cancer	1	0.00649803	0.00473849	0.00346589	0.00887955	0.00511904	0.00347407	0.00973886	0.0034086	0.0261804	0.00884273	0	0.00140354	0.0137694	0.00343315	0.00215237	0.00500447	0	0.0035109	0.0171371	0.00539729	0.0333986	0.0111506	0.00633026	0.00531546	0.0203984	0.0201897	0.00504948	0	0.00703408	0.0087036	0.0587114	0.0190358	0.0152426	0.00709137	0.0039692	0.00552005	0.0068213	0.00750056	0.00328994	0.00378506	0.00148538	0.0101317	0.00369504	0	0.00769289	0.00431702	0.00517224
67	cancer	1	0.00622626	0.00470269	0.003579	0.00874156	0.00512657	0.00351502	0.00964131	0.00343504	0.0259248	0.00878155	0	0.00136362	0.0134882	0.00364698	0.00209941	0	0.00513457	0.00367098	0.0170312	0.00542249	0.0328948	0.0109969	0.00634223	0.00512657	0.0203943	0.0204503	0.00510258	0	0.00696606	0.00849763	0.0580878	0.0189707	0.0152078	0.00707403	0.00372696	0.00560244	0.00684209	0.00756189	0.00331108	0.00373496	0.0014396	0.0100892	0.00370297	0	0.00747791	0.0042828	0.00511857
68	cancer	1	0.00458925	0.0051956	0.00417313	0.00332106	0.00176753	0.00265923	0.00856026	0.00299609	0.0238538	0.00802525	0.0042088	0.00144256	0.00399082	0.00177943	0.00387193	0.00526297	0	0	0.00656287	0.00271075	0.0352001	0.0116079	0.00596444	0.00601992	0.00565532	0.0128404	0.00416124	0.0042405	0.00522731	0.00893279	0.0371737	0.0121587	0.00585348	0.0051203	0.00325369	0.00380852	0.0042088	0.00437128	0.00229066	0.00279001	0.00095114	0.00702655	0.00266319	0	0.00665402	0.00416124	0.00378474
69	cancer	1	0.00437591	0.00489333	0.00398415	0.00347412	0.00225078	0.00281256	0.00817527	0.00280886	0.0234355	0.00779089	0.00392871	0.00137117	0.00387697	0.00203273	0.003585	0.00555489	0	0	0.00667474	0.0025058	0.034294	0.0115163	0.00585056	0.00589122	0.00777611	0.0136747	0.00422438	0.0042983	0.00531097	0	0.0371509	0.0119303	0.00563251	0.00534792	0.00309344	0.00383631	0.00426873	0.00432047	0.00198838	0.00270907	0	0.00703324	0.0025982	0	0.00671909	0.00410981	0.00381414
70	cancer	1	0.00325559	0.0044779	0.00502638	0.0096845	0.0138372	0	0.0108716	0.00375313	0.0091086	0.00312239	0.0140096	0.00389417	0.0102839	0.00931232	0.00389025	0.0178098	0.00994698	0.00341621	0.0100723	0.00338487	0.0220056	0.00809	0.0029696	0.00436429	0.0468319	0.0183191	0.0113691	0.025696	0.00591961	0.00687552	0.0186011	0.00617426	0.00893622	0.00792938	0.00280897	0.00607632	0.00792546	0.00812134	0.00399995	0.00745534	0	0.00591961	0.00203719	0	0.00406655	0.00398036	0.00528886
71	cancer	1	0.00310533	0.00450986	0.00517941	0.00958537	0.014076	0	0.0108437	0.00380952	0.00923905	0.00312458	0.0137412	0.00387878	0.0103781	0.00950071	0.00382491	0.0182972	0.00996247	0.00343241	0.0100779	0.00324002	0.0219451	0.0078807	0.00287446	0.00426358	0.0468301	0.0186782	0.0113939	0.0262087	0.00586435	0.00666473	0.0182472	0.00608753	0.00915054	0.00774602	0.00286676	0.00602981	0.00801538	0.00799999	0.00386339	0.00748821	0	0.00585665	0.00199711	0	0.00405194	0.00402116	0.00532948
72	cancer	1	0.00317337	0.00458465	0.00533465	0.00955237	0.0134556	0	0.0112459	0.00386288	0.00921769	0.00314514	0.0140725	0.00401611	0.0102782	0.00952011	0.00387095	0.0177136	0.0102056	0.00348788	0.0103185	0.00325805	0.0218708	0.00798786	0.00284273	0.00416127	0.0457659	0.0186692	0.0113669	0.0258345	0.00588303	0.00666932	0.0183668	0.006129	0.0089314	0.0077177	0.00279434	0.00605642	0.00797576	0.00804431	0.00394353	0.00738706	0	0.00587497	0	0	0.00399191	0.00398385	0.00529836
73	cancer	1	0.00784289	0.00630262	0.00340409	0.00201212	0	0.00279068	0.00790693	0.00282101	0.0225176	0.00746203	0.00324568	0.00112908	0.0033569	0.00226827	0.00357598	0	0.00500165	0.0044961	0.00691603	0.00358946	0.0288471	0.0094236	0.00548699	0.00307379	0	0.00352205	0.0032322	0.00381865	0.00434443	0.00749574	0.0285303	0.00978423	0.0047118	0	0.00276035	0.00314794	0.00296594	0.00370742	0.0018099	0.00245364	0.0015369	0.00575999	0.00207279	0	0.00356587	0.00253116	0.00287157
74	cancer	1	0.0078638	0.00634198	0.0033854	0.00200222	0	0.00263739	0.00780254	0.00270832	0.022334	0.00741886	0.00319195	0.00118328	0.00342409	0.00221824	0.00339507	0	0.00489755	0.00442037	0.00691267	0.00361754	0.0279924	0.0091825	0.00541342	0.00291144	0	0.00358208	0.00319517	0.00382067	0.00426238	0.00737373	0.0287791	0.00982089	0.00467185	0	0.00284374	0.00329835	0.00308233	0.00371104	0.00165723	0.00234399	0.00156051	0.00560042	0.00205381	0	0.00366913	0.00265351	0.00274701
75	cancer	1	0.00702816	0.00305423	0.00397393	0.00601466	0	0.00323726	0.00398537	0	0.00749488	0	0.0027408	0.00453445	0.00330131	0.00269962	0.00346832	0	0.00342257	0.00230154	0.010238	0.00402884	0.00488906	0.00315261	0.00243881	0.00483644	0	0	0.00245711	0	0.00212538	0.00220545	0.00299475	0.00287578	0.00226722	0.00223748	0.00226494	0.0019721	0.002496	0.0017456	0.0020453	0	0	0.00170213	0.00241136	0	0.00276597	0.00151911	0.00158774
76	cancer	1	0.00749585	0.00296975	0.00400866	0.0058489	0	0.00319324	0.00393416	0	0.00733076	0	0.00288519	0.00464288	0.00333015	0.00276036	0.00351538	0	0.00333619	0.00216439	0.0104112	0.00406705	0.00469523	0.00312478	0.00250869	0.00483818	0	0	0.00249056	0	0.00207581	0.00207581	0.00291136	0.00286304	0.00262546	0.00217446	0.00223486	0.00199527	0.00256305	0.00185836	0.00217245	0	0	0.00138119	0.00231741	0	0.00275633	0.00152615	0.00152615
77	cancer	1	0.00769637	0.00814931	0.00553107	0.00647379	0	0.00290547	0.00635595	0.00222421	0.0175801	0.0060098	0.00581831	0.00148035	0.00846232	0.00218371	0.00586986	0	0.00816773	0.00307118	0.0206955	0.00646274	0.0217155	0.00746806	0.00452208	0.00223526	0	0.00390342	0.00430113	0.00493083	0.00346521	0.00599507	0.0250371	0.00824138	0.00848442	0.00433427	0.0100789	0.00282814	0	0.00536905	0.00282077	0.00234942	0.00125204	0.00482772	0.00175286	0.00379663	0.00304172	0.00211374	0.0016608
78	cancer	1	0.00776917	0.00813845	0.0055069	0.00637811	0	0.00282515	0.00630282	0.00230171	0.0175819	0.00585466	0.0057722	0.0014807	0.0088053	0.00239134	0.00584749	0	0.00812411	0.00300441	0.0207046	0.0064534	0.0217408	0.00741782	0.00440623	0.00221925	0	0.00415527	0.00433453	0.00491175	0.00344898	0.00597656	0.0248886	0.00826393	0.00886983	0.00439906	0.00995974	0.00262438	0	0.0056037	0.00263514	0.00228737	0.00120463	0.00503365	0.0018428	0.00377524	0.00293271	0.00209377	0.00163845
79	cancer	1	0.00858863	0.00394419	0.00112	0.00206011	0	0.000793094	0.00224775	0.0008047	0.00563484	0.00208913	0.0012438	0.000468119	0.00141403	0.000466185	0.0007428	0	0.00144305	0.00200788	0.00284353	0.00417825	0.0129797	0.00425176	0.00173707	0.000798897	0	0.00237928	0.0012941	0	0.00101942	0	0.0116469	0.00394806	0.00222647	0	0.00133278	0.0012322	0	0.00174868	0.000988466	0.000922697	0.000771816	0.0021723	0.000814372	0	0.00180671	0.0011084	0.000827913
80	cancer	1	0.00857665	0.00388072	0.00112801	0.00204747	0	0.000773491	0.00219914	0.000784865	0.0056552	0.00204937	0.00120194	0.000437932	0.00136498	0.00051566	0.000712825	0	0.00157731	0.00196785	0.00280769	0.00408168	0.0124081	0.00412149	0.00165504	0.00079624	0	0.00232616	0.00124934	0	0.00100099	0	0.0114621	0.00385418	0.00218776	0	0.00127019	0.00120194	0	0.00173277	0.000942218	0.000898614	0.000748845	0.00222947	0.000820886	0.000879656	0.00182377	0.00106924	0.000654054
81	cancer	1	0.00873864	0.00390008	0.00111925	0.00215581	0	0.000719246	0.00220774	0.000819248	0.00560973	0.00207504	0.0012558	0.000434624	0.00141541	0.000465394	0.000732708	0	0.00157311	0.00199043	0.00287698	0.00419624	0.0127156	0.00420586	0.00175388	0.00079617	0	0.00241928	0.00125387	0	0.00111156	0	0.0117195	0.00397124	0.00220005	0	0.00130195	0.00125003	0	0.00184427	0.00100771	0.000898096	0.000763477	0.00221735	0.000819248	0.000886557	0.00189619	0.00108656	0.00080194
82	cancer	1	0.00337423	0.00235287	0.00107267	0.00114262	0	0.000769521	0.00207771	0.000729879	0.00535867	0.00178855	0.000823154	0.000352114	0.00105401	0.000536333	0.00131985	0	0.00165097	0.00128254	0.00378931	0.00210569	0.0100831	0.00342553	0.00163232	0.0012802	0	0.00114029	0	0.000956072	0.00107267	0.00314104	0.00591832	0.00210103	0.00119392	0	0.00129186	0.000578307	0.000741539	0.00107267	0.000601626	0	0.00124056	0.00136648	0	0	0	0.000732211	0.000596962
83	cancer	1	0.00346487	0.00230341	0.000994605	0.00107911	0	0.000741078	0.00201955	0.000680405	0.00526989	0.00180719	0.000780082	0.000210189	0.00117229	0.000604564	0.0012958	0	0.00164684	0.00132181	0.00380723	0.00208455	0.0101779	0.0034497	0.00155366	0.00118746	0	0.00119396	0	0.000853757	0.00105744	0.00305099	0.00601963	0.0021864	0.00156883	0	0.00118312	0.000528722	0.000669571	0.00108778	0.000585062	0.000699907	0.00119396	0.00135431	0	0	0	0.000695573	0.00069124
84	cancer	1	0.00762915	0.00658257	0.00605928	0.00561649	0.00174036	0.00328181	0.00614925	0.00213105	0	0	0.00315395	0.00120049	0.00823531	0.00250753	0.00528736	0	0.00985964	0.00392586	0.00672227	0.00435917	0.0214644	0.00720294	0.00339073	0.00331496	0.00663703	0.0160373	0.00467646	0.00660151	0.00879175	0.00779253	0.0298962	0.0099804	0.00586748	0.00525658	0.00422184	0.00304266	0	0.00836554	0.00298583	0.00335758	0.00125732	0.00566148	0.0020458	0.00196056	0.00461253	0.00446809	0.00377195
85	cancer	1	0.00757435	0.00655123	0.00595227	0.00547218	0.00159877	0.0032558	0.00612473	0.00205556	0	0.00447469	0.00302275	0.00117228	0.00782605	0.00251002	0.00525776	0	0.00964622	0.00397828	0.00661415	0.00419502	0.0208446	0.00688217	0.00328144	0.00327212	0.00626923	0.0159248	0.00448868	0.0064883	0.00848327	0.00759765	0.029752	0.00993988	0.00580079	0.00524611	0.00419968	0.00299944	0	0.00811038	0.00299012	0.00334204	0.0012119	0.00563065	0.00198564	0.00185513	0.00444673	0.00434884	0.00373357
86	cancer	1	0.00780799	0.00680968	0.00602747	0.00542143	0	0.00333084	0.00621538	0.00210938	0	0.00453822	0.00321574	0.00115804	0.00796067	0.00281877	0.00524526	0	0.00994086	0.00398151	0.00682377	0.00439728	0.0213028	0.00715263	0.0033238	0.0033191	0.00625062	0.0160529	0.00452412	0.00646907	0.00840933	0.00762242	0.029731	0.010218	0.00593116	0.00534861	0.00416003	0.00302548	0	0.00830597	0.00296206	0.00344594	0.00129898	0.0057221	0.00211408	0.00191676	0.00465097	0.00443721	0.0036644
87	HSIL	-1	0.00897034	0.00518386	0.00198686	0.00425805	0	0.00250004	0.00631772	0.00227813	0.0137242	0.00441408	0.00990655	0.00292307	0.00344666	0.00224692	0.00307911	0	0.00622064	0.00425805	0.00687599	0.00440021	0.0241128	0.00832539	0.0043378	0.00617556	0.00293001	0.0085161	0.00364431	0.0063524	0.00372059	0.00623104	0.0376914	0.0128296	0.0047851	0.00279131	0.00211516	0.00365471	0.00252085	0.00297855	0.00444529	0.00302016	0.00181349	0.00912637	0.00275317	0.00239949	0.00385582	0.00221224	0.00223998
88	HSIL	-1	0.00885732	0.00527764	0.00198379	0.00444397	0	0.00237851	0.00654686	0.00227303	0.013713	0.0044814	0.0100789	0.00305906	0.00345718	0.00225941	0.00307947	0	0.00605687	0.00437932	0.00701984	0.00444397	0.0244691	0.0084626	0.00413773	0.00630186	0.00317135	0.00893898	0.00354565	0.00665575	0.00364093	0.00625082	0.0389035	0.0132196	0.00494077	0.00284809	0.00188171	0.00353884	0.00252143	0.0028583	0.00448821	0.00302163	0.00180005	0.00906488	0.00287191	0.00246358	0.00382127	0.00217094	0.00231386
89	HSIL	-1	0.00884307	0.00534097	0.0019284	0.0044973	0	0.0023554	0.00649112	0.00226242	0.0140153	0.00456617	0.0102033	0.0031302	0.00349522	0.00227964	0.00316808	0	0.00602279	0.00441121	0.00715917	0.004363	0.025107	0.0085848	0.0042287	0.00627762	0.00317152	0.00919087	0.00368117	0.00680793	0.00380514	0.00639814	0.0398489	0.0134437	0.00496218	0.00289948	0.00190429	0.00345734	0.00258612	0.0029167	0.00434233	0.00302001	0.00180787	0.00926319	0.00285127	0.00252413	0.00382236	0.00226587	0.00233129
90	HSIL	-1	0.00665169	0.0038951	0.00140754	0.00405496	0.00262013	0.00173505	0.00345841	0	0.00707668	0.00240568	0.0073769	0.00223023	0.00214835	0.00142313	0.00210156	0.00268641	0.00342722	0.00306071	0.00360657	0.00571203	0.0224114	0.00888971	0.00287356	0.00338823	0.0105975	0.00849591	0.00191051	0.00684664	0.00244857	0.00458522	0.0223763	0.00821909	0.0031231	0.00201578	0.00165707	0.00187932	0.00191051	0.00208986	0.00331025	0.00200018	0.00188711	0.00457352	0.0015674	0.00241348	0.00281118	0.0019261	0.00168437
91	HSIL	-1	0.00682586	0.00402119	0.00144341	0.00409943	0.00262082	0.00173678	0.0034853	0	0.00693539	0.00227659	0.00768643	0.00227659	0.00215533	0.00135735	0.00210839	0.00276946	0.00346183	0.00309804	0.00359873	0.00580491	0.0234739	0.00897728	0.00279293	0.00337186	0.0109214	0.00862523	0.00191672	0.0070723	0.00248	0.00466662	0.0224139	0.00814409	0.00308239	0.00213968	0.00168202	0.00183457	0.00199886	0.00210056	0.00314498	0.00190889	0.00186586	0.00452971	0.00152946	0.00232744	0.00266385	0.00190107	0.00163508
92	HSIL	-1	0.00681986	0.00405045	0.00139581	0.00422447	0.00280644	0.00174754	0.00343215	0	0.00686429	0.00247692	0.00758256	0.00221035	0.00221775	0.00139211	0.00220294	0.00278422	0.00338031	0.00319519	0.00360986	0.00583872	0.0234993	0.00914498	0.002899	0.00353581	0.0119329	0.00884509	0.00186602	0.00724194	0.00247692	0.00470578	0.0228514	0.00828232	0.00312114	0.00217332	0.00161055	0.00185121	0.00201782	0.0021437	0.00303969	0.00192156	0.00188824	0.00445031	0.00155502	0.00235104	0.00272498	0.00193267	0.0016735
93	HSIL	-1	0.00643312	0.00398708	0.00214905	0.00305685	0.00463712	0.00220508	0.00671611	0.00234518	0.0114793	0.00372931	0.0103782	0.0029756	0.00876709	0.0026842	0.00349955	0	0.00792653	0.00405152	0.00935829	0.00366206	0.0213588	0.00785648	0.00397307	0.0026814	0.0191901	0.0028271	0.00360322	0.010947	0.00340149	0.00586995	0.0357773	0.0117651	0.00750344	0.00478842	0.00250208	0.00385259	0.00411036	0.00424485	0.00885675	0.00397307	0.00185765	0.00828237	0.00256933	0.0129167	0.00555894	0.00281869	0.0034239
94	HSIL	-1	0.00658637	0.00420811	0.00216606	0.0029928	0.0044396	0.00238377	0.00723122	0.00255463	0.0121889	0.00400969	0.0100394	0.00286052	0.00873589	0.00276958	0.00360459	0	0.00841622	0.00414748	0.00960397	0.00367073	0.0229035	0.00827843	0.00414748	0.00257667	0.0190894	0.00283572	0.00368451	0.0111141	0.00337586	0.00635763	0.0373852	0.012222	0.00755916	0.00489706	0.00254085	0.00380025	0.00416953	0.00440377	0.00895084	0.00402898	0.00188221	0.0085485	0.00254636	0.0126629	0.0054372	0.00284399	0.0035412
95	HSIL	-1	0.00672902	0.00425943	0.0022695	0.00305889	0.00467331	0.00251619	0.00751293	0.00262857	0.0127975	0.00418816	0.010232	0.00286703	0.00902867	0.00288073	0.0036619	0	0.00867783	0.00438551	0.00986192	0.0038291	0.0237969	0.00872443	0.0042841	0.00258471	0.0199788	0.00286429	0.00367835	0.0117532	0.00369205	0.00658923	0.0383732	0.0125946	0.00781992	0.0051475	0.0025436	0.00393326	0.00437455	0.00456093	0.00918491	0.00426217	0.00194059	0.00877925	0.00262857	0.0128578	0.00538596	0.00283962	0.00362627
96	HSIL	-1	0.00872001	0.00498794	0.00278819	0.00990084	0.0134078	0.00386634	0.00620432	0.00212866	0	0.00560008	0	0.00116504	0.0109119	0.00263022	0.00181667	0	0.00717584	0.00313573	0.0062912	0.00347142	0.0265155	0.00902805	0.00425732	0.00513011	0.0412147	0.0185498	0.00351881	0	0.00454957	0.00543026	0.0461039	0.0149204	0.00811182	0.00623591	0.00334109	0.00451403	0.00666638	0.00674932	0.00251174	0.00233402	0.00141779	0.00737331	0.00271316	0	0.00612533	0	0.00428497
97	HSIL	-1	0.00872001	0.00498794	0.00278819	0.00990084	0.0134078	0.00386634	0.00620432	0.00212866	0	0.00560008	0	0.00116504	0.0109119	0.00263022	0.00181667	0	0.00717584	0.00313573	0.0062912	0.00347142	0.0265155	0.00902805	0.00425732	0.00513011	0.0412147	0.0185498	0.00351881	0	0.00454957	0.00543026	0.0461039	0.0149204	0.00811182	0.00623591	0.00334109	0.00451403	0.00666638	0.00674932	0.00251174	0.00233402	0.00141779	0.00737331	0.00271316	0	0.00612533	0	0.00428497
98	HSIL	-1	0.00876104	0.00497248	0.00289359	0.010254	0.0133603	0.00406547	0.00604403	0.00210698	0	0.00563468	0.00307018	0.0011759	0.0112694	0.00200264	0.00184211	0	0.00725204	0.00303004	0.0063972	0.00351967	0.0262671	0.00888545	0.00427417	0.00531763	0.0406186	0.0191515	0.00352368	0	0.00455911	0.00539388	0.0467188	0.0148211	0.0081149	0.00631694	0.00329492	0.00455108	0.00696709	0.00673432	0.00256049	0.00233975	0.00150098	0.00750487	0.00274911	0	0.00617647	0	0.00435042
99	HSIL	-1	0.00824765	0.00391593	0.00219031	0.00185878	0.000809818	0.00103265	0.0023588	0.000812536	0	0	0.00231804	0.00103265	0.00317949	0.00151637	0.00311155	0.00352733	0	0.00263327	0.00625571	0.00364146	0.0152208	0.00509533	0.00196476	0.00595407	0.00306535	0.00737533	0	0.00176638	0.00276371	0.00292404	0.0112016	0.00383441	0.00421758	0.00192943	0.00172562	0.00112505	0.00129625	0.0026686	0.00394583	0	0.0013506	0.00224195	0.000899496	0.00625299	0.00314416	0.00163866	0.00116581
100	HSIL	-1	0.00823757	0.00401998	0.0022631	0.00191118	0	0.00110177	0.00239845	0.000855429	0	0	0.00239033	0.00105304	0.00320515	0.00153761	0.00305085	0.00349751	0	0.00264479	0.0062181	0.00370325	0.0154925	0.00511904	0.00193825	0.00603402	0.00298317	0.0074444	0	0.00190035	0.00287489	0.00290467	0.0111422	0.00386838	0.0041824	0.00193554	0.00170274	0.00139684	0.00132104	0.00270705	0.0040308	0	0.00132916	0.00223603	0.000850015	0.00639406	0.00312123	0.00163777	0.00115862
101	HSIL	-1	0.00834177	0.00396358	0.00223608	0.00189887	0	0.00113324	0.0023577	0.000845785	0	0	0.00228307	0.00108073	0.0031869	0.00150638	0.00306252	0.00343842	0	0.00262028	0.00640143	0.00361532	0.0154342	0.00503325	0.00195968	0.00614162	0.00308739	0.00745176	0	0.00182701	0.00284693	0.00297131	0.0114292	0.00390001	0.00428144	0.00197903	0.00165011	0.0014207	0.00137371	0.00259264	0.00399952	0	0.00133225	0.00224161	0.000928706	0.00623283	0.00309016	0.00171368	0.00122998
102	HSIL	-1	0.00318004	0.00164622	0.00229488	0.00441881	0.00614699	0.0020045	0.00321751	0.00111465	0.0117624	0.00354301	0.00377484	0.00125516	0.00828263	0.00102801	0.00279132	0	0.00887976	0.00274917	0.00552643	0	0.011465	0	0.00257822	0.00208178	0.0100928	0.00778384	0.00209817	0.00351491	0.00620553	0.0031777	0.0135655	0.00438602	0.00662235	0.00421742	0.00570675	0	0.00289669	0.00996163	0.00414483	0.001864	0.00111231	0.00232532	0.000833649	0.00841845	0	0	0.00301378
103	HSIL	-1	0.00324367	0.00171866	0.00242791	0.00464764	0.00608066	0.00209628	0.00332113	0.00121517	0.0116724	0.0037399	0.00373022	0.00107477	0.00822294	0.00111108	0.0029314	0	0.00932675	0.00287331	0.00588701	0	0.0117595	0	0.00267966	0.00215438	0.0102611	0.00757178	0.00209386	0.00354383	0.00630579	0.00327514	0.0136815	0.00438137	0.00656237	0.00432812	0.00605646	0	0.00285152	0.00961965	0.00407879	0.0018058	0.000922266	0.00238676	0.000924687	0.00835123	0	0	0.00301613
104	HSIL	-1	0.00319492	0.00163677	0.0023801	0.00443619	0.00592525	0.00190837	0.00334025	0.00115312	0.0116527	0.00355705	0.00382628	0.00129369	0.00815764	0.00117218	0.00282325	0	0.00915113	0.00282087	0.00574418	0	0.0114216	0	0.00265171	0.00209182	0.0100779	0.0076192	0.00209421	0.00348796	0.00620638	0.00319492	0.0134658	0.00434566	0.00658758	0.0043671	0.00573703	0	0.00281848	0.00987541	0.0040955	0.00187264	0.000922023	0.00233007	0.000902963	0.00847689	0	0	0.00306388
105	HSIL	-1	0.00301382	0.00241189	0.00556271	0.00579518	0.00635145	0	0.0107186	0.00343725	0.00919092	0.00288929	0.00711113	0.00237868	0.00399768	0.00953962	0.00339159	0.00283117	0.00961435	0.0032712	0.00470754	0.00323799	0.0167172	0.00557101	0.00244925	0.00378596	0.0304911	0.0108514	0.0103865	0	0.00594047	0.0053925	0.0200299	0.00635145	0.00338744	0.00484038	0	0.00460791	0.00696999	0.0073436	0.00344556	0.00370294	0	0.00596538	0	0.00557516	0.00305949	0.00273154	0.00376105
106	HSIL	-1	0.00289442	0.00232845	0.00554954	0.00722086	0.00615729	0	0.0109319	0.00337682	0.00907071	0.00290202	0.00714489	0.00240062	0.00421628	0.00987978	0.00352876	0.00304636	0.00973923	0.00323628	0.0046721	0.00329326	0.0165461	0.00568628	0.00254117	0.00399217	0.0283137	0.0135567	0.0108788	0	0.00597117	0.00561032	0.0208649	0.0066359	0.00377946	0.00593318	0.00206256	0.00492279	0.00738419	0.00751334	0.00346419	0.00388202	0	0.00628644	0.00215752	0.00647256	0.00322868	0.0031907	0.00425427
107	HSIL	-1	0.00291938	0.00242142	0.00567911	0.00718822	0.00625691	0	0.011419	0.00352759	0.00944998	0.0029688	0.00715781	0.00239861	0.00423843	0.0105524	0.00349338	0.00316266	0.00997836	0.00332612	0.00483903	0.0032843	0.0170868	0.00567151	0.00258487	0.00405216	0.0289962	0.0134679	0.0107652	0	0.00632153	0.00586157	0.0211237	0.00658762	0.00388491	0.00598321	0.00203749	0.00496827	0.00749992	0.00765958	0.00347437	0.00390771	0	0.00636334	0.00220474	0.00648118	0.00323869	0.00311325	0.00425363
108	HSIL	-1	0	0.00242201	0	0.00983411	0.00927666	0.00323703	0.0060281	0	0.012556	0.00424043	0.00779655	0.00244507	0.00247967	0	0	0.0046787	0.00396363	0.00259501	0.00502086	0	0.0162044	0.00585126	0.00352536	0.00305634	0.0324933	0.0118832	0.00333314	0.0168656	0.00708917	0.00500548	0.00392519	0	0.00369068	0.00630875	0.00234512	0.00449801	0.00399823	0.0041251	0.00407128	0.00266805	0	0.00344079	0	0.0089422	0	0.00242201	0.00455952
109	HSIL	-1	0	0.00243562	0	0.00979504	0.00931092	0.00323124	0.00605716	0	0.0128949	0.00419198	0.00782102	0.00249192	0.00245814	0	0	0.00462356	0.00401559	0.002597	0.00502512	0	0.0163814	0.00578695	0.00362154	0.00300606	0.0340387	0.0119229	0.00351646	0.0166366	0.00737818	0.00498384	0.00390676	0	0.00365156	0.00629359	0.00232679	0.00462731	0.00413193	0.00417697	0.00406438	0.00261576	0	0.00350145	0	0.00908574	0	0.00245439	0.00445468
110	HSIL	-1	0	0.00240762	0	0.00967557	0.00920231	0.00312878	0.00602845	0	0.0130034	0.00414667	0.0077074	0.00237757	0.00248275	0	0	0.00470257	0.00396638	0.00250528	0.00501807	0	0.0162824	0.00588196	0.00354946	0.00303488	0.0323696	0.0117902	0.00346683	0.0167895	0.00730926	0.00496173	0.00389126	0	0.00364712	0.00629888	0.00234753	0.00457862	0.00412038	0.00405653	0.00407531	0.00258791	0	0.00339171	0	0.00919855	0	0.00244518	0.00455233
111	HSIL	-1	0.00296971	0.00224877	0	0.00307222	0.00596917	0.00187839	0.00644538	0.00223885	0.0104866	0.00357489	0.00804929	0.00233476	0.00210326	0	0.00211319	0.00211319	0.00351206	0.00215287	0.00507628	0.00278782	0.014164	0.00505974	0.00382953	0.00269853	0.027521	0.00406433	0.00317474	0.0103708	0.00386921	0.00460007	0.0273987	0.00873053	0.00447771	0.00376339	0.00191146	0.00474888	0.00382953	0.00391551	0.0046629	0.00271176	0.00172296	0.00917037	0.00246042	0.0106453	0	0.00192469	0.0028275
112	HSIL	-1	0.00274975	0.00227664	0	0.00333082	0.00440404	0.00197182	0.00667433	0.00223219	0.0107545	0.00352133	0.00781741	0.00234967	0.00214645	0.00174003	0.00211153	0.0020385	0.00335622	0.00206072	0.00481047	0.00272752	0.0145997	0.00517562	0.00394364	0.00242905	0.0191403	0.00354673	0.00332764	0.0108085	0.00369597	0.00468981	0.0286247	0.00897955	0.00468981	0.00408652	0.00179718	0.00499781	0.00395951	0.0038579	0.00474062	0.0027307	0.0016797	0.00970985	0.00257829	0.0101449	0	0.00201945	0.00292121
113	HSIL	-1	0.00274827	0.00220598	0	0.00342111	0.00460946	0.00187458	0.00677862	0.00214907	0.0109462	0.00358514	0.00808747	0.00256081	0.00208547	0.00173733	0.00200848	0.00205869	0.00334746	0.00212229	0.00464963	0.00269471	0.0143472	0.00514171	0.00387971	0.00238005	0.0195358	0.00358514	0.00318344	0.010742	0.00385293	0.00459607	0.0280049	0.00880718	0.00464963	0.00402365	0.00178085	0.00481365	0.00382615	0.00386297	0.00464963	0.00271814	0.00170386	0.00934277	0.00242691	0.0111102	0	0.00197835	0.00282526
114	HSIL	1	0.00533446	0.00389257	0.00203035	0.0118917	0	0.00393333	0.00677634	0.00238955	0.014508	0.00488864	0.0110663	0.00333212	0.00352573	0.00314106	0.00305699	0.00303407	0.00649866	0.00298312	0.00571913	0.00356649	0.0276378	0.00903852	0.00379322	0.00407599	0.00474853	0.00808575	0.00359197	0.00922703	0.00409383	0.00685022	0.0377819	0.0119325	0.0048326	0.00393588	0.00451416	0.00364547	0.00349262	0.00397664	0.00472051	0.00412185	0.00264685	0.00796602	0.0025424	0.00373463	0.00329646	0.00266468	0.00325315
115	HSIL	1	0.0051377	0.00381459	0.00201199	0.0112951	0	0.003851	0.00639709	0.00230939	0.0141871	0.00472802	0.0108945	0.00321979	0.00322889	0.00295274	0.00296791	0.00279494	0.00644868	0.0029406	0.00566574	0.00345649	0.0263956	0.00894015	0.00375996	0.00412109	0.00370534	0.0073864	0.00335635	0.0084546	0.00389956	0.0067825	0.037111	0.0114498	0.00492528	0.00379031	0.00429406	0.00353843	0.00318337	0.0037023	0.00453987	0.00403005	0.00255823	0.00772325	0.00242471	0.0037023	0.00321069	0.00254306	0.00301647
116	HSIL	1	0.00661135	0.00415677	0.00731798	0.00456873	0.00493778	0	0.0142183	0.00474896	0.0113117	0.00365041	0.0068488	0.00205121	0.00648262	0.0133572	0.00529538	0.00350737	0.0146617	0.00490058	0.00735803	0.00388499	0.0245487	0.00849091	0.00326992	0.00529824	0.0146159	0.0136947	0.0178773	0	0.00909455	0.00900872	0.0260392	0.00813045	0.00456015	0.00762122	0.0027378	0.00901158	0.0125733	0.0132628	0.00540981	0.00527535	0.00195108	0.00760406	0.00253755	0	0.00389071	0.00437991	0.00614504
117	HSIL	1	0.00662004	0.00397958	0.00722714	0.00448501	0.00487426	0	0.013975	0.00472321	0.0111457	0.0036891	0.00649223	0.00200722	0.00640218	0.0132139	0.00512988	0.00343928	0.0145066	0.00493816	0.00730267	0.00378786	0.0244962	0.0082932	0.00324466	0.00519378	0.0150962	0.0133853	0.0177164	0	0.00923436	0.00883931	0.0255419	0.00795334	0.00455473	0.00756991	0.00269565	0.00876669	0.0125284	0.0132197	0.00540002	0.00528383	0.00198688	0.00761058	0.00257365	0	0.00379948	0.00427006	0.00607975
118	HSIL	1	0.00661925	0.00411345	0.00753992	0.00444005	0.00503412	0	0.014269	0.004868	0.011338	0.00374462	0.00674595	0.0020525	0.00651226	0.0135735	0.00533538	0.00340113	0.0150911	0.005158	0.00751739	0.00387695	0.0250017	0.00859573	0.00342647	0.00534664	0.0153642	0.0133567	0.0177208	0	0.00946009	0.00900961	0.0258773	0.00816778	0.00468218	0.00765817	0.00280143	0.00894204	0.0129851	0.013734	0.0054846	0.00534382	0	0.00768351	0.00255648	0	0.00380093	0.00441189	0.00621382
119	HSIL	1	0.00196343	0.0035073	0.00561168	0.00773244	0.00787011	0	0.011479	0.0035663	0.00983355	0.00314673	0.00649014	0.00219616	0.00492988	0.00929925	0.00381869	0.00191426	0.0106333	0.00339257	0.00534289	0.00236988	0.0221025	0.00715882	0.00294023	0.00313362	0.0311559	0.0139177	0.0128983	0	0.00627052	0.00747022	0.0237841	0.00786028	0.00452015	0.00695887	0.00234694	0.00590996	0.00876824	0.00839457	0.0044251	0.0043497	0	0.00767344	0.00244527	0	0.00394981	0.00372691	0.00500527
120	HSIL	1	0.00186096	0.00361318	0.00567608	0.00815218	0.00873004	0	0.0116224	0.00363182	0.00997896	0.0032093	0.0062353	0.00217474	0.00520074	0.00939178	0.00414133	0.00201008	0.0110881	0.00361939	0.00568229	0.00228659	0.0235183	0.00759917	0.00310677	0.0033491	0.0326056	0.0150119	0.0136729	0	0.00663296	0.00777004	0.0256278	0.00833237	0.00477511	0.00759606	0.00255688	0.00634093	0.00934828	0.00921159	0.00452036	0.00445201	0	0.00818946	0.00259416	0	0.00436812	0.00399531	0.0053654
121	HSIL	1	0.00185645	0.00369399	0.00571435	0.00795533	0.00845648	0	0.0118668	0.00370345	0.0101238	0.0032748	0.00644558	0.00216534	0.00508712	0.00997568	0.00416993	0.00197307	0.0112648	0.00361835	0.00582781	0.00229141	0.0237178	0.00773155	0.00307623	0.00327164	0.0325872	0.0147129	0.0137894	0	0.00660002	0.00787653	0.025527	0.00808771	0.00478769	0.00760232	0.00258454	0.00628799	0.00915304	0.0094241	0.00457337	0.00452294	0	0.00813183	0.00261605	0	0.00439371	0.0039493	0.00529199
122	HSIL	1	0.00387177	0.0034106	0.00174144	0.00309054	0.013904	0.0023678	0.00632906	0.0020615	0.00988421	0.00312495	0.00938174	0.00320067	0.00670075	0.00256053	0.00272917	0.00274294	0.00505567	0.00253988	0.010483	0.00393028	0.0209351	0.00808082	0.00329703	0.00378573	0.0486501	0.0145338	0.00320411	0.017762	0.0036756	0.00558568	0.00561665	0.0020443	0.00666977	0.00383047	0.0027567	0.00362054	0.0028806	0.00444996	0.00560633	0.00298729	0	0.00483541	0	0.00722731	0.00209936	0.00178618	0.00289781
123	HSIL	1	0.00339437	0.00305007	0	0.00235495	0.0102806	0.00187422	0.00513866	0.00162735	0.00841935	0.00289415	0.00757807	0.00249137	0.00546673	0.00216006	0.00232572	0.00192943	0.00418044	0.00217955	0.00922491	0.00361525	0.0169751	0.00674003	0.00279671	0.00356978	0.0376922	0.0101636	0.00254659	0.0131065	0.00312153	0.00459946	0.00430387	0.00165334	0.00537253	0.00313777	0.002264	0.00302083	0.00221528	0.00354379	0.00469691	0.00247513	0	0.00395632	0	0.00569086	0.0018125	0.00146819	0.0022705
124	HSIL	1	0.00341052	0.00309737	0.00144317	0.00224304	0.00983331	0.00196394	0.00504429	0.00170185	0.00842077	0.00293059	0.00776045	0.00241323	0.00544593	0.00213753	0.00237238	0.00182779	0.00406403	0.00215455	0.00919682	0.00371004	0.0169947	0.00689932	0.00291698	0.00355347	0.0359159	0.00980608	0.00267532	0.0129511	0.0031178	0.00476859	0.00407424	0.00162697	0.0055106	0.00315524	0.00226006	0.00315524	0.0022975	0.00362495	0.00482305	0.00252555	0	0.0040436	0	0.00553783	0.00180737	0	0.0022056
125	HSIL	1	0.0131702	0.00754031	0.00542396	0.0163226	0	0.0120582	0.0129548	0.00428974	0.0305921	0.0101256	0.0117065	0.00359907	0.00413767	0.00679578	0.0165697	0	0.0159455	0.00666589	0.0115291	0.0066849	0.0397641	0.0133983	0.00947925	0.00638392	0	0.00503427	0.00718864	0.00548098	0.00697637	0.0104329	0.0401474	0.0132557	0.00643144	0.00447666	0.0175993	0.00942539	0.00428657	0.0210527	0.00910223	0.0323505	0	0.0185751	0.00449567	0.00495506	0.00609244	0.00294959	0.00374481
126	HSIL	1	0.0133099	0.00754436	0.00561274	0.0166236	0	0.0126205	0.0134368	0.00452987	0.0322879	0.0106727	0.0120645	0.00369739	0.00417866	0.00703707	0.0167699	0	0.0164708	0.00684196	0.0120645	0.00674115	0.0417184	0.0139083	0.00974263	0.00648425	0	0.00503391	0.00704032	0.00564201	0.00722568	0.010871	0.0424338	0.0139863	0.00673789	0.00462417	0.0183016	0.00915729	0.00439979	0.022077	0.00954101	0.0341968	0	0.0184902	0.00464694	0.00512496	0.00609727	0.00306002	0.00383722
127	HSIL	1	0.0138317	0.00799477	0.00582774	0.0174526	0	0.0133297	0.014	0.00467076	0.0337574	0.0109974	0.0125125	0.00387802	0.00433713	0.00744995	0.0177189	0	0.0169659	0.00701838	0.0125829	0.00689901	0.0433836	0.0145571	0.0102659	0.0067674	0	0.00527986	0.00727855	0.00589813	0.00749893	0.0113525	0.0436927	0.0146765	0.00707654	0.0048085	0.0189157	0.00948538	0.00456669	0.022962	0.00992613	0.0363744	0	0.0189463	0.00481156	0.00532883	0.00617055	0.00306079	0.00393617
128	HSIL	1	0.00627097	0.0055241	0.00249875	0.00924125	0	0.00404756	0.00824657	0.00294963	0.0172675	0.0057134	0.0145657	0.00421965	0.00310451	0.00282228	0.00394775	0.00617116	0.00994338	0.00574781	0.00698342	0.00604725	0.0245401	0.00908981	0.0052281	0.00701096	0.00764769	0.012893	0.00501127	0.0120601	0.00474969	0.00710733	0.048261	0.0156568	0.00636046	0.00426784	0.0024127	0.00440207	0.00365176	0.00390645	0.00476346	0.0039271	0.00192397	0.01047	0.00334199	0.00361045	0.00458449	0.00308042	0.00330413
129	HSIL	1	0.00602751	0.00575416	0.00255247	0.00992626	0	0.00409693	0.0086039	0.00303426	0.0181782	0.00596601	0.015038	0.00437371	0.00321536	0.002901	0.00399784	0.00641363	0.0104251	0.00581566	0.00719611	0.00594551	0.0250531	0.0093693	0.00544663	0.00746605	0.00591134	0.0130801	0.00527578	0.0120516	0.00468807	0.00745238	0.0507589	0.0163194	0.00660498	0.00442838	0.00244654	0.00459239	0.00378941	0.00404909	0.00510835	0.00399101	0.00199892	0.0108523	0.00338279	0.0036664	0.00453772	0.0031641	0.0034853
130	HSIL	1	0.0060575	0.00575799	0.00253742	0.00966171	0	0.004109	0.00876318	0.00304894	0.018297	0.00592625	0.0148341	0.00428063	0.00328114	0.00288741	0.00390372	0.00649162	0.0103819	0.00587914	0.00722861	0.00594308	0.0257309	0.00946652	0.00549886	0.00743726	0.00602048	0.0131145	0.00531714	0.0119366	0.0049234	0.00745409	0.0505128	0.0163923	0.00659931	0.00448255	0.00240281	0.00453303	0.00385661	0.00400131	0.00505801	0.00397439	0.00198888	0.0111155	0.00344941	0.00374892	0.00446572	0.00318355	0.00343595
131	HSIL	1	0.00838391	0.00401487	0	0.00467221	0.00951442	0.00220719	0.00362103	0	0.00456454	0	0.00887691	0.00249336	0.00219585	0.00213919	0.00270019	0.00605205	0.0037032	0.00445404	0.0040942	0.00519071	0.0169123	0.00595855	0.00267752	0	0.0352186	0	0.00481671	0.0121438	0.00270019	0.0037882	0.0314701	0.0109084	0.00544288	0.00316203	0.00171135	0.00518788	0.00591322	0.00296369	0.00606622	0.00284753	0.00178218	0.00973259	0.00250752	0.00926791	0.00425287	0.00262369	0.00221852
132	HSIL	1	0.0033346	0.00262557	0	0.00254279	0.00232504	0	0.00192914	0.000685635	0.00522774	0.00182476	0	0	0	0.000759418	0.00239163	0.00719467	0	0.00285052	0.00251579	0.00231424	0.0139772	0.00468787	0.00178337	0.00122371	0.00985263	0.00392306	0.00221347	0	0.00122011	0.00280732	0.0110619	0.00378089	0.0020839	0.00157822	0	0.00114632	0.00154043	0.00175638	0.000829601	0.000890786	0.00091418	0.00204251	0.000777413	0.00104915	0.00235204	0	0.00191654
133	HSIL	1	0.00332378	0.00269257	0	0.00241664	0.00236434	0	0.0018738	0.000679905	0.00521561	0.00182691	0	0	0	0.000829592	0.00240942	0.00693972	0	0.00280258	0.00256272	0.00231564	0.0139642	0.0045844	0.00176559	0.000991903	0.0100164	0.00381432	0.00229941	0	0.00121193	0.00288554	0.0112103	0.00378186	0.00214071	0.00165558	0	0.00121373	0.00157983	0.0017223	0.000793523	0.000858447	0.000878285	0.00205054	0.000789916	0.000977476	0.00228498	0	0.00195315
134	HSIL	1	0.00333953	0.00273827	0	0.00241437	0.00233991	0	0.00197505	0.000714817	0.00533879	0.00188012	0	0	0	0.000735293	0.00244601	0.00686894	0	0.00284624	0.0026061	0.00229523	0.0146668	0.00479523	0.00178332	0.00106106	0.0101024	0.00370997	0.00237155	0	0.00120812	0.00292256	0.0110387	0.00373231	0.00209233	0.00168466	0	0.00122301	0.00151712	0.00174795	0.000824645	0.000889798	0.00090469	0.0021761	0.000807892	0.000951228	0.00231943	0	0.00206999
135	HSIL	1	0	0.00198987	0.000934195	0.00168703	0.00233891	0.00125928	0.00219006	0.000788762	0.00717414	0.00253225	0	0.000526982	0	0.000756253	0.000573179	0.00153817	0	0.000865756	0.00296342	0.000992369	0.00772508	0.00263833	0.00192143	0.00129692	0.00449132	0.00849673	0.00120282	0	0.00384628	0.00229956	0.00619717	0.00221059	0.00333983	0.00237142	0.000918797	0.00173664	0.00182048	0.00274441	0.000999213	0.000828115	0.000918797	0.00140471	0.000573179	0.00232864	0	0	0.00172467
136	HSIL	1	0.0015486	0.00204519	0.000991452	0.00169395	0.00226321	0.00124061	0.00224591	0.000839187	0.00759594	0.00259542	0	0.000515624	0	0.000662698	0.000536387	0.00145171	0	0.00106758	0.00311797	0.000763054	0.00785548	0.00269059	0.00196387	0.00131328	0.00447105	0.00840225	0.0011887	0	0.00291899	0.00227013	0.00624978	0.00222687	0.00325985	0.00235664	0.000948194	0.00173028	0.0017943	0.0026058	0.000970688	0.000821884	0.000875523	0.00146382	0.000610789	0.00218535	0	0	0.00182545
137	HSIL	1	0	0.00201808	0.000895186	0.00163567	0.0022962	0.00120285	0.00226317	0.000804798	0.00772989	0.00260734	0	0.000493656	0	0.000719625	0.000582305	0.00150356	0	0.00102555	0.00304016	0.000691813	0.00794369	0.00258648	0.00189814	0.00131584	0.00452808	0.00848254	0.00121676	0	0.00301582	0.00226491	0.00615679	0.00218495	0.00323484	0.00231358	0.000957762	0.00171737	0.00180254	0.00265427	0.000990788	0.00092995	0.000888233	0.00144968	0.000577091	0.00220059	0	0	0.00182861
138	HSIL	1	0.00507562	0.00519776	0.00400892	0.00850098	0.00565375	0	0.00599031	0.00211982	0	0.00603374	0.00569175	0.00194611	0.00621017	0.00258124	0.00367779	0	0.00539861	0.00143583	0.00518961	0.00236681	0.0230466	0.00870455	0.00474719	0.0495076	0.0164754	0.0590101	0.00363164	0	0.00680458	0.00559946	0.0324432	0.0103765	0.00607988	0.00581117	0.00388407	0.00428849	0	0.00723886	0.00413649	0	0.0046522	0.00588717	0.00222296	0.00502947	0.00447306	0	0.00399807
139	HSIL	1	0.00522874	0.00536991	0.0040911	0.00837872	0.00564394	0	0.00622522	0.00227252	0	0.00622522	0.00573252	0.0019542	0.00606744	0.00247182	0.00380322	0	0.00546679	0.0012539	0.00531178	0.00248843	0.0235169	0.00878008	0.00489381	0.049846	0.016572	0.0579729	0.00374233	0	0.00679542	0.00560796	0.0327703	0.0102969	0.00628612	0.00599271	0.00401636	0.00447861	0	0.00714973	0.00420182	0	0.00476925	0.00605637	0.00221993	0.00491596	0.00450353	0	0.00398314
140	HSIL	1	0.00523644	0.00543489	0.00422147	0.00846562	0.00572691	0	0.00654058	0.00216318	0	0.00616068	0.00581196	0.00199024	0.00627975	0.00254876	0.00389543	0	0.00559649	0.00136085	0.0051769	0.00247505	0.0239396	0.00897027	0.00513437	0.0504734	0.0168859	0.0578134	0.00382739	0	0.00679574	0.00582897	0.0331027	0.0105012	0.0062996	0.00597923	0.00408822	0.00445962	0	0.00715013	0.00426683	0	0.00483102	0.00614367	0.00225107	0.00477432	0.00461838	0	0.00398899
141	HSIL	1	0	0.00212175	0.00178385	0.00088644	0.00176849	0.00146131	0.00321005	0.00107514	0.00948974	0.00335048	0.00150739	0.000557317	0	0.000888635	0.00155346	0	0.00303013	0.00283705	0.00385514	0.00209762	0.0109752	0.00394729	0.00252548	0.00160832	0.00585402	0.00401312	0.00164562	0.00132966	0.00498294	0.00315959	0.00752816	0.00280852	0.00360281	0.00276903	0.00127919	0.00175752	0.001955	0.00312009	0.00166098	0.00132966	0.00127481	0.00198791	0.000772344	0.00406358	0	0.00143279	0.00196158
142	HSIL	1	0	0.00213942	0.00178026	0.000915627	0.00178913	0.00145214	0.00308608	0.00109077	0.00951543	0.0032701	0.00151422	0.000634066	0	0.00076487	0.00157186	0	0.00295085	0.00274466	0.0038177	0.00202192	0.0109144	0.00387534	0.00254957	0.0015763	0.0057598	0.00392633	0.00153861	0.00129252	0.00477323	0.00317255	0.00750238	0.00279122	0.00337208	0.00269146	0.00126592	0.00181795	0.00186894	0.00309717	0.00159182	0.0013036	0.00127035	0.00193324	0.000767087	0.00388199	0	0.00140559	0.00207291
143	HSIL	1	0	0.0021218	0.00175889	0.000921745	0.0017856	0.00152288	0.00308139	0.00109986	0.00961598	0.00333743	0.00148281	0.000572194	0	0.000832688	0.00153179	0.00304799	0	0.00284539	0.00380943	0.00224648	0.0108628	0.0038651	0.00260939	0.00159413	0.00586666	0.00397642	0.00162307	0.00135145	0.00494046	0.00313928	0.00744743	0.00271848	0.00356007	0.00270067	0.00122677	0.00177002	0.00178783	0.00313482	0.00160971	0.00124235	0.0012802	0.00196149	0.000759215	0.00399646	0	0.00132918	0.00208172
144	HSIL	1	0.00707159	0.00247593	0.000872105	0.000826482	0	0.000484308	0.00112128	0.00040359	0	0.00117918	0.000593101	0	0.00123709	0.000452722	0.000986163	0.00130026	0	0.00187932	0.00264965	0.00397975	0.0076647	0.00252156	0.00101775	0.00070365	0.00149855	0.00149328	0.000507119	0	0.00143187	0.00186353	0.00595383	0.00223729	0.00163366	0	0.000851048	0.000498346	0.000765066	0.00132132	0.000542214	0.00057029	0.000954578	0.00118445	0	0.000524667	0	0.000738745	0.00040008
145	HSIL	1	0.00701523	0.00248314	0.000924001	0.000780467	0	0.000586696	0.00115545	0.000407278	0.0029281	0.00110342	0.000584901	0	0.00124516	0.000473663	0.00121825	0.00128284	0	0.00186236	0.00265717	0.00388798	0.00768625	0.00262309	0.00101191	0.000726641	0.00145149	0.00146405	0.000475457	0	0.00130975	0.00188747	0.00598358	0.00222478	0.00162911	0	0.000882735	0.000547224	0.000529282	0.0012936	0.000540047	0.00053287	0.000983209	0.00118954	0	0.00054543	0	0.000740995	0.00040369
146	HSIL	1	0.00683801	0.00247362	0.000908061	0.000755237	0	0.000584642	0.00116573	0.000403385	0.00288234	0.00109465	0.000579311	0	0.00120127	0.000431818	0.00116573	0.00123326	0	0.00181435	0.00264244	0.003698	0.00759502	0.00251094	0.00099869	0.000725028	0.00141985	0.00140385	0.000444257	0	0.00119239	0.0019032	0.00574869	0.00216975	0.00139674	0	0.000852974	0.000570426	0.000570426	0.00125281	0.000529554	0.000575757	0.000961372	0.00119416	0	0.000565095	0	0.000709034	0.00059175
147	HSIL	1	0.00491211	0.00339109	0	0.00340211	0	0	0.00432795	0.00149164	0.00747288	0.00247626	0.00617229	0.00190312	0.00191782	0.0017231	0.00203171	0	0.00272609	0.00325882	0.00363357	0.00352335	0.0162463	0.00610249	0.00245422	0.00224848	0.00535667	0.00396423	0.00246157	0.0043206	0.00267098	0.00454839	0.00266364	0.00130426	0.00256811	0.00168268	0	0.00301634	0.00174147	0.00187373	0.00268568	0.00181495	0.00132631	0.00310084	0	0.00239544	0	0	0.00150633
148	HSIL	1	0.00499363	0.00364232	0.00125423	0.00370057	0	0	0.00448106	0.00150663	0.00827871	0.00276475	0.00673713	0.00202696	0.00181339	0.00139014	0.00213181	0.00128141	0.00242304	0.00352194	0.00392578	0.00338992	0.0177146	0.00651579	0.00260942	0.00230266	0.00584014	0.00439952	0.00224053	0.00468687	0.0027764	0.00516448	0.00259001	0.00139402	0.00260554	0.00188329	0	0.00257059	0.00181728	0.00194542	0.00274145	0.00182893	0.00137849	0.00283852	0	0.00254729	0	0	0.00168525
149	HSIL	1	0.00495315	0.00390398	0.00124304	0.0039382	0	0	0.00459203	0.00163078	0.00911183	0.00295745	0.0070515	0.00220858	0.00193108	0.00135708	0.00228461	0.0013989	0.0025355	0.00376333	0.0042309	0.00341741	0.0185924	0.0067626	0.00266094	0.00242526	0.00640527	0.00486192	0.00234163	0.00519264	0.00297645	0.00525346	0.00274837	0.00147872	0.00261533	0.00194249	0	0.0025545	0.00186266	0.00204132	0.00289282	0.00182084	0.0014065	0.00293464	0	0.0028092	0	0	0.00174862
150	HSIL	1	0.00282312	0.00263764	0.00171762	0.00342781	0.00963795	0	0.00451477	0	0.00560173	0.00195133	0.00643272	0.00192907	0.00222214	0.00207746	0.00319039	0.00748258	0.00368008	0.00215537	0.00498962	0.00179923	0.0118267	0.00455558	0.0024336	0	0.0401767	0.00187714	0.00497478	0.00883293	0.00328313	0.00359104	0.036018	0.0117006	0.00534576	0.00313103	0.00177326	0.00389153	0.00573899	0.00349459	0.00465574	0.00241876	0	0.00928923	0.00262651	0.00758645	0.0046372	0.00259312	0.00221472
151	HSIL	1	0.0028385	0.00276285	0.00180828	0.00363458	0.00899818	0.00179387	0.00498898	0.00172183	0.00614168	0.00210006	0.00680087	0.00206764	0.0023414	0.0021649	0.0035085	0.00738802	0.00390474	0.00226215	0.00487372	0.00180828	0.012622	0.00454952	0.00248909	0	0.0349733	0.00192715	0.00524114	0.00867759	0.0033392	0.00363818	0.039087	0.01273	0.00552571	0.00327796	0.00188753	0.00363818	0.00586431	0.00387592	0.00493495	0.00256473	0.00166059	0.00960695	0.00288533	0.00811566	0.00472603	0.00265479	0.00235581
152	HSIL	1	0	0.00285979	0.00187072	0.00368217	0.00988333	0	0.00529358	0.00172995	0.00636415	0.00213744	0.00718653	0.00217448	0.00245231	0.00220782	0.00368217	0.00788295	0.00406372	0.002356	0.00478608	0.00181145	0.0134136	0.00476756	0.00256715	0.00173366	0.0380664	0.00207817	0.00554177	0.00946473	0.00351177	0.00397482	0.0421523	0.013358	0.0055603	0.0034562	0.00201149	0.0037044	0.00616041	0.00407854	0.00519727	0.00282645	0.00172995	0.0100982	0.00302279	0.008509	0.00486757	0.00273384	0.00245601
153	LSIL	-1	0.00329974	0.00315637	0.00228208	0.00677574	0.00523634	0.00292135	0.00441375	0	0.00742206	0.00251241	0.00764063	0.00237374	0.00321983	0.00237609	0.00263697	0.00476864	0.00299186	0	0.00351126	0.00352301	0.0135679	0.00477334	0.00332089	0.00411527	0.0156949	0.00417638	0.00370868	0.00921765	0.00350186	0.00383794	0.036974	0.0111096	0.00467698	0.00387085	0.00319398	0.00527864	0.00452421	0.00392255	0.00637385	0.00274978	0	0.0105855	0.00271218	0.00846792	0.00862303	0.00403301	0.0028908
154	LSIL	-1	0.00338806	0.00319102	0.0022491	0.0065959	0.00504845	0.00285943	0.00455826	0	0.0072591	0.00251581	0.0075955	0.00239567	0.00313335	0.00243171	0.00267681	0.00463035	0.00309731	0.00211213	0.00345774	0.00369563	0.0138742	0.00491629	0.00332078	0.00425069	0.0157509	0.00430356	0.00370524	0.00906606	0.00382058	0.00373888	0.0354449	0.0108202	0.00472646	0.00394553	0.00308049	0.00548337	0.00435161	0.00396715	0.00630996	0.00276091	0	0.0108202	0.00280897	0.00889546	0.00849418	0.00390468	0.00287144
155	LSIL	-1	0.00339122	0.00306217	0.00225672	0.00687331	0.00539993	0.00293939	0.00433173	0	0.00722446	0.002463	0.00756825	0.00236232	0.0032488	0.00239424	0.0026398	0.00483759	0.00307199	0.00202835	0.00328809	0.00355575	0.0134544	0.0048646	0.00319723	0.00401987	0.0167818	0.00401495	0.00351155	0.0092921	0.00365152	0.003708	0.0360806	0.0110724	0.00484496	0.00397321	0.0031383	0.00530171	0.00448153	0.00381114	0.0064976	0.00270365	0	0.0105126	0.0026619	0.00899006	0.00845719	0.00408862	0.00280924
156	LSIL	-1	0.00385319	0.00340371	0	0.00448109	0.00259052	0	0.00418601	0	0.00805979	0.00264885	0.00611089	0.00206899	0.00254592	0	0.00173617	0.00247387	0.00627559	0.00242583	0.00522222	0.00427522	0.0156941	0.00536976	0.00239152	0.00270032	0.0121154	0.00618295	0.002268	0.00584326	0.00297138	0.00461491	0.00342429	0.00188027	0.00253906	0.00223025	0.00235377	0.00214447	0.00197292	0.00256994	0.00376055	0.00203125	0	0.00211359	0	0.00424777	0	0	0.00181508
157	LSIL	-1	0.00397392	0.00368209	0.00144834	0.00482419	0.00274896	0.00191671	0.00471611	0.00148076	0.00914399	0.00296153	0.00677332	0.00220133	0.00274536	0.00161767	0.00181222	0.00256882	0.00683817	0.00250397	0.00527094	0.0043198	0.0173152	0.00584019	0.00268051	0.00286065	0.0129342	0.00655355	0.00247154	0.0066112	0.00333622	0.00524212	0.00370011	0.0019023	0.00272014	0.00252919	0.00244272	0.00234184	0.00213648	0.00282102	0.00379378	0.00212567	0.00146996	0.00210766	0	0.00466206	0	0.00145194	0.00195634
158	LSIL	-1	0.00396894	0.00379911	0	0.00503963	0.00310501	0.00200847	0.00495102	0.00159496	0.0092301	0.00304593	0.0069558	0.00228168	0.00276903	0.00167249	0.00183863	0.00270996	0.00710718	0.00254751	0.00522054	0.00436399	0.0178141	0.00599587	0.00268411	0.00298686	0.0145245	0.00698534	0.00244044	0.00696688	0.00342621	0.00541253	0.00374373	0.00193094	0.00269888	0.00262873	0.00251059	0.00235183	0.00221153	0.00283918	0.00383972	0.00234075	0.00153589	0.00217092	0	0.00487718	0	0	0.00204539
159	LSIL	-1	0.00251641	0.00250392	0.00387765	0.00375588	0.00320327	0.00240714	0.00821736	0.00264754	0.0128131	0.00410868	0.0115767	0.00366534	0.00397755	0.0023447	0.0041961	0.00402751	0.00431162	0	0.00526074	0.00218859	0.0168749	0.00593199	0.00380272	0.00649084	0.013322	0.0203998	0.00284111	0.0168562	0.00748367	0.0054387	0.00482676	0.00194819	0.0033906	0.00525761	0.00211678	0.00312834	0.00365598	0.00516707	0.00587891	0.00349987	0.0020481	0.00359354	0	0.00840469	0	0.00258822	0.00372466
160	LSIL	-1	0.00247557	0.00256375	0.00385379	0.00377867	0.00315815	0.00242332	0.00814194	0.00261927	0.012675	0.00402688	0.0115516	0.00368069	0.00394524	0.00233513	0.00402688	0.00403995	0.00436654	0	0.00509484	0.00213265	0.016715	0.0058754	0.00357618	0.00656777	0.0133968	0.0204316	0.00284789	0.0171461	0.00732546	0.00535285	0.00467027	0	0.00339003	0.00529733	0.00210652	0.00318754	0.00370682	0.00507524	0.00593418	0.00348147	0.0020412	0.00351413	0	0.0084816	0	0.00249843	0.00369703
161	LSIL	-1	0.0025118	0.00247871	0.00380576	0.00372965	0.0031108	0.00243238	0.00800534	0.00263756	0.0126417	0.00408044	0.0115331	0.00359065	0.00398447	0.0023	0.0039977	0.0040672	0.00429224	0	0.00501699	0.00211137	0.0162986	0.0058708	0.0037131	0.0063672	0.0130521	0.0207629	0.00282619	0.0173543	0.00738318	0.00533468	0.00470591	0	0.00336231	0.00525857	0.0021213	0.00313396	0.0037131	0.00501699	0.00585425	0.00335569	0.00205511	0.00348475	0	0.00839584	0	0.0025118	0.0037131
162	LSIL	-1	0.0013575	0.00171059	0.00146486	0	0	0.00138613	0.0026315	0.000899432	0.00714058	0.00247881	0.00132648	0	0.00251221	0	0.00111177	0.00251459	0	0.00193485	0.00516279	0.0013742	0.0128545	0.00436594	0.00214957	0.00190622	0.00165095	0.00258617	0.000851717	0	0.00193247	0.00421325	0.0124775	0.0042061	0.00283906	0.00151019	0.000901818	0.000928061	0.00113085	0.00138613	0	0	0.00104258	0.00240485	0	0	0.0016748	0.00119765	0.00107598
163	LSIL	-1	0.00132487	0.00169092	0.00145004	0	0	0.00138863	0.00260487	0.000921033	0.00711793	0.00241358	0.0013414	0	0.00250096	0	0.00151852	0.00252457	0	0.00199085	0.00501372	0.00141697	0.0125284	0.00429107	0.00208059	0.00191528	0.00171218	0.00249623	0.000987158	0	0.00183498	0.00420133	0.0123607	0.0041045	0.00277254	0.0015138	0.000911586	0.000876162	0.00119262	0.00138155	0	0	0.00103911	0.00236871	0	0	0.00163897	0.00122096	0.00103911
164	LSIL	-1	0.00129815	0.00175105	0.00146042	0	0	0.00139745	0.00266412	0.000946973	0.00717859	0.0025188	0.001303	0	0.00255029	0	0.000995411	0.00249943	0	0.00192301	0.0050812	0.00143378	0.0127514	0.00427712	0.00214098	0.00186973	0.0016566	0.00255029	0.000884003	0	0.00185762	0.00428439	0.0121871	0.00406641	0.00284334	0.00154519	0.00084283	0.000942129	0.00114799	0.00139018	0	0	0.00101721	0.00233231	0	0	0.00164691	0.00121823	0.00105596
165	LSIL	-1	0.00269928	0	0	0.00418573	0.0144683	0.0028708	0.00797126	0	0.0121039	0.00399788	0.0070361	0	0.00298922	0.00309131	0	0.00381411	0.00420206	0	0.00462267	0	0.0142519	0.00568442	0.00399788	0.00382228	0.0526013	0.00540673	0.00389987	0.0103398	0.00392846	0.00452058	0.0361157	0.0110952	0.00564358	0.00524339	0	0.00512088	0.00593761	0.00447566	0.00603561	0.00330366	0	0.0107645	0.00296472	0.0104623	0	0	0.00372427
166	LSIL	-1	0	0.00264967	0	0.00424733	0.0135192	0.00281454	0.00780771	0	0.0118156	0.00403143	0.00723459	0	0.00307362	0.00301082	0.0026536	0.00385478	0.00409816	0	0.00455351	0	0.0143593	0.00556235	0.00396862	0.00365066	0.0477491	0.00575862	0.00388619	0.0102847	0.00390974	0.00430229	0.0349561	0.0109167	0.00540533	0.00537393	0	0.0050913	0.00589209	0.00442397	0.00608444	0.00336803	0	0.0107282	0.0028695	0.0107204	0	0	0.0037802
167	LSIL	-1	0	0.00264824	0	0.0041843	0.0146217	0.00272601	0.00794472	0	0.0120357	0.00409097	0.00711252	0	0.00292045	0.00301378	0	0.00381486	0.00401319	0	0.00462372	0	0.0141939	0.00565424	0.0040793	0.00354265	0.052222	0.00565424	0.0038032	0.010243	0.00386931	0.00445262	0.0351271	0.0107874	0.00547925	0.00537036	0	0.00521092	0.00584479	0.00443706	0.00605867	0.00337543	0	0.0107485	0.00290879	0.0105191	0	0	0.00377598
168	LSIL	-1	0.00219563	0.00221311	0	0.00188759	0.00356544	0	0.00285978	0.00107269	0.0100409	0.00350208	0	0	0	0.000919761	0.000895729	0.00235293	0	0	0.00409195	0.00229175	0.010196	0.00342125	0.00245124	0.0016429	0.00869512	0.00467308	0.00147468	0	0.00367904	0.00297338	0.00887864	0.00309354	0.00424051	0.00301271	0.00115352	0.00218907	0.00227428	0.0034846	0.00128679	0.00126494	0	0.00198808	0.000677259	0.0023289	0.0012715	0	0.00251678
169	LSIL	-1	0.00225232	0.00217902	0	0.00183473	0.0036006	0.00202575	0.00303197	0.00112838	0.0103131	0.00348065	0	0	0	0.000861833	0.000926249	0.00226564	0	0	0.00419366	0.0023234	0.0107529	0.00345178	0.00246333	0.00163482	0.00878048	0.00462902	0.00149932	0	0.00347177	0.00298976	0.00902926	0.00306084	0.00422254	0.00329407	0.0011728	0.00223677	0.00236338	0.0034962	0.00131052	0.00124833	0	0.00208795	0.000688578	0.00231229	0.00128831	0	0.00255218
170	LSIL	-1	0.00230664	0.00215869	0.00144137	0.00178882	0.00373679	0.00189642	0.00312035	0.00113202	0.0101075	0.00342745	0	0	0	0.000959417	0.000845094	0.00228422	0	0	0.00413132	0.00226629	0.0108697	0.0034947	0.00259132	0.00161846	0.00896203	0.0045931	0.00150637	0	0.00437117	0.00307103	0.00878943	0.00294998	0.00450792	0.00320777	0.00114099	0.00232457	0.00236492	0.00353281	0.0013517	0.00131584	0	0.00206006	0	0.00222369	0.00131808	0	0.00254201
171	LSIL	-1	0.00219759	0.00115934	0.00247117	0.00427185	0.00873654	0.00263487	0.00328293	0.00107413	0.0110126	0.00372693	0	0	0.00451627	0.00145534	0.00169304	0.00300263	0	0	0.00327396	0	0.0128738	0	0.00265729	0.00104273	0.0143897	0	0.00229626	0	0.0112234	0.00325602	0.0104677	0.00348699	0.00399378	0.00573616	0.00193074	0.00374936	0.00359463	0.0064358	0.00208323	0.00117055	0.000609944	0.00217965	0.000892491	0.00198232	0.00164819	0.00234335	0
172	LSIL	-1	0.00220744	0.00117092	0.00259471	0.00423719	0.00889582	0.00272228	0.00344443	0.00110714	0.0108208	0.00365401	0	0	0.00458573	0.00142151	0.00166298	0.00293642	0	0	0.00320751	0	0.0130943	0	0.00279062	0.00105019	0.0145887	0	0.00232134	0	0.0108436	0.00329635	0.0102786	0.00344898	0.00400255	0.00574527	0.00200242	0.00376108	0.0034467	0.0064583	0.00207759	0.00118687	0.000594574	0.00215504	0.000881609	0.00192268	0.00164931	0.00233957	0
173	LSIL	-1	0	0.00115293	0.00258091	0.00421748	0.00872605	0.00259925	0.00342211	0.0011621	0.0104016	0.0036307	0	0	0.00443064	0.00145778	0.00175575	0.00295452	0	0	0.00299807	0	0.0129366	0	0.00277116	0.000953516	0.0137526	0	0.00228981	0	0.0108783	0.00326854	0.010099	0.00346796	0.00402265	0.00565233	0.0020331	0.00361465	0.00342441	0.00675025	0.00208123	0.00122628	0.000634914	0.00219355	0.000907674	0.00190016	0.00162052	0.00239296	0.00414413
174	LSIL	1	0.00422933	0.00419377	0.00241313	0.0047399	0.00433602	0.00265191	0.00611666	0.00214388	0.0102622	0.00348761	0.00556799	0.00180096	0.00414043	0.0024868	0.00420393	0.00471958	0.0047272	0.00382545	0.00587281	0.00281448	0.0217741	0.00757216	0.00402358	0.00298975	0.0142146	0.0024995	0.00374925	0.00489485	0.00343681	0.00583978	0.0352063	0.0109099	0.00501678	0.00391944	0.00197115	0.0047653	0.00331742	0.00315232	0.00616492	0.00305071	0.00199401	0.00972112	0.00259094	0.00587534	0.00775759	0.00400326	0.00306087
175	LSIL	1	0.00410116	0.00425222	0.00243955	0.0047356	0.00469783	0.00258054	0.00614545	0.00212233	0.0101535	0.00352967	0.00551102	0.00173211	0.0041918	0.00245214	0.00413893	0.00488917	0.00443852	0.00380912	0.00600446	0.00276935	0.0215229	0.00749236	0.00383178	0.00315958	0.0154832	0.00244962	0.00370842	0.00492945	0.00342141	0.00588362	0.0340454	0.0108257	0.00498987	0.00400801	0.00205688	0.00469783	0.00321245	0.00318224	0.00605985	0.00311678	0.00202163	0.00966756	0.00258809	0.00590376	0.00784986	0.00399039	0.00309664
176	LSIL	1	0.00409942	0.00404082	0.00235162	0.0048179	0.00467777	0.0024994	0.00623193	0.00206372	0.0100791	0.00349559	0.0055109	0.00176053	0.00419623	0.0024357	0.00415802	0.00473892	0.00439242	0.00386247	0.00591091	0.0027236	0.0214882	0.00756188	0.00379623	0.00308794	0.015134	0.00250194	0.00358221	0.00489943	0.00337839	0.00577587	0.0341355	0.0106091	0.00486376	0.00393891	0.0019771	0.00466758	0.00317202	0.0031389	0.0060383	0.00303443	0.00202805	0.00958229	0.00270067	0.00580899	0.00795679	0.00397458	0.00299112
177	LSIL	1	0.00290651	0.00201145	0	0.00324827	0.00347284	0	0.00348261	0	0.00670158	0.00222952	0.00425074	0.00147116	0.00252245	0	0.00134748	0.0020798	0.0032385	0.00189428	0.00534759	0.00215466	0.0140639	0.00482358	0.00234995	0.00185522	0.0138426	0.00625242	0.00240853	0.00607666	0.00247688	0.00323525	0.00260382	0	0.00321897	0.00264613	0	0.00274703	0.00205051	0.00206027	0.00262335	0.0015688	0.00130517	0.00291953	0	0.00352492	0.00137026	0	0.00199843
178	LSIL	1	0.00292557	0.00235964	0	0.00400307	0.00417573	0.00179371	0.00441233	0	0.00852091	0.00281686	0.0051701	0.00173616	0.00287121	0.0015603	0.0015635	0.00263461	0.00344673	0.00224453	0.00527881	0.00211024	0.0168788	0.00573283	0.00265699	0.00214222	0.0171665	0.00813083	0.00262821	0.00813083	0.00315577	0.0039647	0.00280407	0	0.00334761	0.00335081	0.00145479	0.00277209	0.00248114	0.0024076	0.00305026	0.00186405	0.00153792	0.00283924	0	0.00464254	0	0.00145159	0.00248753
179	LSIL	1	0.00288156	0.00242968	0	0.00426995	0.00451226	0.00183699	0.00474803	0.00154229	0.00905399	0.00301581	0.00553063	0.00184354	0.00296342	0.00168309	0.00170274	0.00278333	0.00361505	0.00233144	0.00520318	0.00207276	0.0185238	0.0062412	0.00276368	0.00228888	0.0190478	0.00877893	0.00266217	0.00901142	0.00338583	0.00429942	0.00289793	0	0.00335636	0.00369036	0.00150954	0.00293395	0.00264252	0.00271456	0.00312387	0.00200072	0.00163397	0.00272438	0	0.00501653	0	0.00159141	0.00267199
180	LSIL	1	0.00198629	0.00205216	0	0.00169858	0.00636793	0.00211455	0.00239187	0	0.00346301	0	0.0115746	0.00359128	0.00318916	0.00207642	0.00306784	0.00325156	0.00401419	0.00204869	0.00328276	0.00159111	0.0103682	0.00363634	0	0.0025132	0.0231006	0.0115191	0.00280092	0.0222409	0.00356354	0.00220815	0.00584102	0.00204522	0.00288758	0.00204522	0.00161191	0.00239187	0.0019239	0.00231561	0.00403152	0.00257213	0	0.00282865	0	0.00639219	0	0.00157032	0
181	LSIL	1	0.0020888	0.00212761	0.00163717	0.00171832	0.00652749	0.00219112	0.00251573	0	0.00341194	0	0.0119929	0.00366951	0.0033696	0.00217348	0.00323199	0.00334137	0.00414231	0.00211702	0.00336254	0.00154543	0.010818	0.00381064	0	0.00260747	0.0246528	0.011933	0.00285446	0.0235554	0.00370127	0.0022758	0.00573008	0.00203234	0.00303793	0.00212408	0.00167245	0.00231109	0.00201117	0.00244516	0.0041035	0.00280506	0	0.00278742	0	0.00641106	0	0.00158424	0.00156307
182	LSIL	1	0.00202958	0.00216657	0.00155012	0.00170153	0.00623654	0.00214494	0.00241171	0	0.00341388	0	0.0122027	0.0037203	0.00326247	0.0021882	0.00322642	0.00327328	0.00410242	0.00210529	0.003212	0.00157896	0.0108256	0.00374553	0	0.00257393	0.0237818	0.0117773	0.00289837	0.0235258	0.00350761	0.00231437	0.0056165	0.00201156	0.00302454	0.00214854	0.00160059	0.00233961	0.00197551	0.00236124	0.00426104	0.00281906	0	0.00263161	0	0.00648168	0	0.00156454	0.00164746
183	LSIL	1	0	0	0	0.00303913	0.0227218	0.00211807	0.00327566	0	0.00469129	0	0.00612126	0	0.00298895	0	0	0.00745088	0.0022005	0	0.00328283	0	0.00806731	0.00302837	0	0	0.0781249	0	0.00215033	0.00796696	0.00308213	0.00245495	0.0104613	0.00345127	0.00519662	0.00552275	0.00196755	0.00304988	0.00444042	0.0038455	0.00203564	0	0	0.00197113	0	0.0082465	0	0	0.00338318
184	LSIL	1	0	0	0	0.00304262	0.0253575	0.0020156	0.00354914	0	0.00497438	0	0.00572543	0	0.00307755	0	0	0.00723801	0.00226712	0	0.00337098	0	0.0086912	0.00330112	0	0	0.0894376	0	0.00212739	0.00798556	0.00300419	0.00256754	0.010588	0.00350023	0.00520145	0.00555077	0.00193526	0.00297625	0.00447485	0.00383559	0.00205403	0	0	0.0021728	0	0.00791919	0	0	0.00328715
185	LSIL	1	0	0	0	0.00294251	0.022783	0.00218903	0.00338174	0	0.0049887	0	0.00586717	0	0.00302464	0	0	0.00711345	0.00236758	0	0.0033139	0	0.00843829	0.00324605	0	0	0.0716059	0	0.00220331	0.00786336	0.00305678	0.00254613	0.0102667	0.00330675	0.00530295	0.00568148	0.00196763	0.00321391	0.00433163	0.00368171	0.0019462	0	0	0.00203548	0	0.00803834	0	0	0.00335318
186	LSIL	1	0.00707159	0.00247593	0.000872105	0.000826482	0	0.000484308	0.00112128	0.00040359	0	0.00117918	0.000593101	0	0.00123709	0.000452722	0.000986163	0.00130026	0	0.00187932	0.00264965	0.00397975	0.0076647	0.00252156	0.00101775	0.00070365	0.00149855	0.00149328	0.000507119	0	0.00143187	0.00186353	0.00595383	0.00223729	0.00163366	0	0.000851048	0.000498346	0.000765066	0.00132132	0.000542214	0.00057029	0.000954578	0.00118445	0	0.000524667	0	0.000738745	0.00040008
187	LSIL	1	0.00701523	0.00248314	0.000924001	0.000780467	0	0.000586696	0.00115545	0.000407278	0.0029281	0.00110342	0.000584901	0	0.00124516	0.000473663	0.00121825	0.00128284	0	0.00186236	0.00265717	0.00388798	0.00768625	0.00262309	0.00101191	0.000726641	0.00145149	0.00146405	0.000475457	0	0.00130975	0.00188747	0.00598358	0.00222478	0.00162911	0	0.000882735	0.000547224	0.000529282	0.0012936	0.000540047	0.00053287	0.000983209	0.00118954	0	0.00054543	0	0.000740995	0.00040369
188	LSIL	1	0.00683801	0.00247362	0.000908061	0.000755237	0	0.000584642	0.00116573	0.000403385	0.00288234	0.00109465	0.000579311	0	0.00120127	0.000431818	0.00116573	0.00123326	0	0.00181435	0.00264244	0.003698	0.00759502	0.00251094	0.00099869	0.000725028	0.00141985	0.00140385	0.000444257	0	0.00119239	0.0019032	0.00574869	0.00216975	0.00139674	0	0.000852974	0.000570426	0.000570426	0.00125281	0.000529554	0.000575757	0.000961372	0.00119416	0	0.000565095	0	0.000709034	0.00059175
189	LSIL	1	0.00388237	0.00299807	0	0.00483242	0.00478639	0	0.00452998	0	0.00515787	0	0.00539455	0	0.00624269	0.0023932	0.00348789	0.00715987	0.00617695	0	0.0119956	0.00379361	0.0107201	0.00439191	0.0025477	0.00207104	0.0204704	0.00236032	0.00435904	0.00808362	0.00263317	0.00317559	0.0417034	0.012847	0.00819538	0.00250168	0.00328078	0.00416837	0.00562796	0.00386593	0.00529265	0.00267591	0.00195927	0.0110357	0.00316244	0.0062164	0.00394483	0.00241621	0
190	LSIL	1	0.00420679	0.0029695	0	0.00489822	0.00507289	0	0.00454887	0	0.00506198	0	0.00510565	0	0.006423	0.00229627	0.00320968	0.00725271	0.00621921	0	0.0121728	0.00384652	0.0105934	0.00459617	0.00236541	0	0.0239743	0.00234721	0.00412673	0.00858098	0.00271112	0.00318057	0.0415803	0.0127914	0.0084245	0.0024855	0.00308595	0.00375554	0.00569154	0.00385016	0.00500011	0.00269293	0	0.0103459	0.0030532	0.0061064	0.00402848	0.00250369	0
191	LSIL	1	0.00379893	0.00310941	0	0.00491858	0.00471173	0	0.00440637	0	0.00525678	0	0.00543737	0	0.00631733	0.00243302	0.0034082	0.0072334	0.00634688	0	0.0121027	0.00366103	0.010461	0.0044392	0.00258078	0.0021014	0.0206364	0.00247899	0.00430786	0.00855006	0.00276465	0.00316195	0.0422972	0.0130319	0.0083629	0.00247571	0.0033097	0.00401892	0.00572631	0.00394997	0.00507947	0.00284017	0	0.0108288	0.00311269	0.00630091	0.00394669	0.00253809	0.00195693
192	LSIL	1	0.00164741	0.00156739	0	0.00145456	0.00239828	0.00204541	0.00310607	0.00112015	0.00969774	0.00323121	0	0	0	0.000720099	0.000820625	0.00155098	0	0.00140942	0.0031471	0.00149764	0.0136388	0.00472885	0.00263626	0.00126171	0.0083396	0.00334405	0.0015756	0.00165151	0.00349586	0.00400055	0.00904124	0.00320864	0.00240033	0.00286398	0.00117349	0.00205772	0.00201874	0.00213978	0.000783697	0.00116118	0.00121658	0.00203925	0.000763181	0.00165971	0.00132121	0	0.00232442
193	LSIL	1	0	0.0016332	0	0.00144334	0.00246204	0.00204558	0.00310103	0.00113507	0.00976447	0.00340726	0	0	0	0.000798225	0.000816598	0.00158216	0	0.00141271	0.0031929	0.00147396	0.0131064	0.0046689	0.0025437	0.00124531	0.00841913	0.00345217	0.00153725	0.00151479	0.00367469	0.00378085	0.00913161	0.0031439	0.00237834	0.00282543	0.00118407	0.00206803	0.0020762	0.00207212	0.000830888	0.00116774	0.00133514	0.00204558	0	0.00173119	0.00124735	0	0.00239671
194	LSIL	1	0	0.00163934	0	0.00142612	0.00253444	0.0020718	0.00306144	0.00107412	0.00976563	0.00340339	0	0	0	0.000818663	0.000776423	0.00162526	0	0.00135371	0.00311173	0.00145428	0.013167	0.00453181	0.00251633	0.0012109	0.00863117	0.00347982	0.00146233	0	0.00358844	0.00361459	0.00926679	0.00320425	0.00241375	0.00273759	0.00113849	0.00202755	0.00211807	0.00213013	0.000822686	0.0011405	0.00135572	0.00196519	0.000788491	0.00172985	0.00122699	0	0.00234938
[truncated: 423 more columns]
