# Supplementary material for: Shotgun Lipidomics for Differential Diagnosis of HPV-Associated Cervix Transformation
Source: Metabolites. 2022 May 31;12(6):503. doi: 10.3390/metabo12060503 (PMC9229224; doi:10.3390/metabo12060503)
Supplement: Supplementary file 1 [file metabolites-12-00503-s001.zip › Supplementary3_new.xlsx]

## Sheet: Supplementary3_22052001
Table S2. Identified lipid species with their accurate mass and characteristic fragment ion.
#	Lipid Name	Precursor Ion			Fragment Ion 1			Fragment Ion 2
		Theoretical Mass	Experimental Mass	Mass error, ppm	Theoretical Mass	Experimental Mass	Mass error, ppm	Theoretical Mass	Experimental Mass	Mass error, ppm
1	LPC 16:0	496.34	496.336	8	184.073	184.074	2	258.11	258.111	2
2	LPC 18:0	524.371	524.367	8	184.073	184.072	5	258.11	258.109	5
3	LPC 18:1	522.355	522.351	9	184.073	184.073	2	258.11	258.112	8
4	LPC 18:3	518.324	518.32	8	184.073	184.075	8	258.11	258.111	4
5	LPC 20:3	546.355	546.36	8	184.073	184.074	4	258.11	258.11	1
6	LPC 20:4	544.34	544.335	8	184.073	184.072	9	258.11	258.111	2
7	LPC 20:5	542.324	542.329	8	184.073	184.074	6	258.11	258.111	5
8	LPC 30:1	690.543	690.549	9	184.073	184.073	1	258.11	258.11	1
9	PC O-34:5	738.543	738.537	8	184.073	184.073	1	258.11	258.108	9
10	PC O-42:2	856.715	856.722	8	184.073	184.073	3	258.11	258.111	2
11	PC O-42:3	854.7	854.707	9	184.073	184.074	6	258.11	258.109	3
12	PC O-44:2	884.747	884.754	8	184.073	184.073	2	258.11	258.11	1
13	PC O-44:3	882.731	882.738	8	184.073	184.074	2	258.11	258.111	4
14	PC O-44:4	880.715	880.721	6	184.073	184.073	2	258.11	258.112	8
15	PC O-46:4	908.747	908.755	9	184.073	184.075	8	258.11	258.109	5
16	PC O-46:5	906.731	906.732	2	184.073	184.074	4	258.11	258.112	7
17	LPE 18:1	480.308	480.308	2	142.026	142.027	2	216.063	216.064	2
18	LPE 22:0	538.387	538.384	5	142.026	142.028	8	216.063	216.065	6
19	LPE 26:2	590.418	590.417	2	142.026	142.027	1	216.063	216.064	6
20	PE O-34:1	704.559	704.565	9	142.026	142.025	7	216.063	216.064	5
21	PE O-34:3	700.528	700.533	7	142.026	142.027	2	216.063	216.062	6
22	PE O-36:3	728.559	728.553	8	142.026	142.025	8	216.063	216.063	1
23	PE O-36:4	726.543	726.544	2	142.026	142.027	5	216.063	216.064	4
24	PE O-36:5	724.528	724.522	8	142.026	142.027	6	216.063	216.062	6
25	PE O-36:6	722.512	722.505	9	142.026	142.028	8	216.063	216.062	4
26	PE O-38:5	752.559	752.552	9	142.026	142.026	6	216.063	216.064	4
27	PE O-38:6	750.543	750.537	8	142.026	142.026	3	216.063	216.064	5
28	PE O-42:1	816.684	816.677	8	142.026	142.026	2	216.063	216.064	3
29	PE O-42:2	814.668	814.674	7	142.026	142.027	5	216.063	216.062	6
30	PE O-44:0	846.731	846.739	9	142.026	142.025	8	216.063	216.062	7
31	PE O-44:1	844.715	844.722	8	142.026	142.027	3	216.063	216.065	8
32	PE O-46:0	874.762	874.77	8	142.026	142.027	1	216.063	216.064	2
33	PE O-46:1	872.747	872.755	9	142.026	142.026	5	216.063	216.063	1
34	PE O-46:2	870.731	870.738	8	142.026	142.026	6	216.063	216.063	1
35	PE O-48:0	902.794	902.799	6	142.026	142.026	3	216.063	216.062	7
36	PE O-48:1	900.778	900.785	7	142.026	142.026	6	216.063	216.064	4
37	PE O-48:2	898.762	898.769	8	142.026	142.026	2	216.063	216.063	2
38	PC 20:1	564.366	564.361	9	184.073	184.073	0	184.073	184.073	1
39	PC 30:0	706.538	706.532	8	184.073	184.072	7	184.073	184.074	6
40	PC 32:0	734.569	734.563	9	184.073	184.074	2	184.073	184.074	5
41	PC 32:1	732.554	732.548	8	184.073	184.074	5	184.073	184.075	8
42	PC 32:2	730.538	730.537	1	184.073	184.075	7	184.073	184.073	3
43	PC 34:0	762.601	762.594	9	184.073	184.073	4	184.073	184.074	4
44	PC 34:1	760.585	760.579	8	184.073	184.074	4	184.073	184.075	8
45	PC 34:2	758.569	758.563	8	184.073	184.074	5	184.073	184.072	7
46	PC 34:3	756.554	756.548	8	184.073	184.073	4	184.073	184.072	5
47	PC 34:4	754.538	754.532	9	184.073	184.074	5	184.073	184.072	7
48	PC 34:5	752.522	752.529	8	184.073	184.072	7	184.073	184.072	8
49	PC 36:1	788.616	788.609	9	184.073	184.072	8	184.073	184.073	1
50	PC 36:2	786.601	786.594	8	184.073	184.072	7	184.073	184.074	4
51	PC 36:3	784.585	784.578	9	184.073	184.074	4	184.073	184.075	7
52	PC 36:4	782.569	782.563	9	184.073	184.073	0	184.073	184.074	6
53	PC 36:5	780.554	780.547	8	184.073	184.073	1	184.073	184.072	6
54	PC 36:6	778.538	778.545	8	184.073	184.073	1	184.073	184.075	8
55	PC 38:1	816.648	816.655	8	184.073	184.073	0	184.073	184.072	4
56	PC 38:4	810.601	810.594	9	184.073	184.073	4	184.073	184.073	1
57	PC 38:5	808.585	808.578	9	184.073	184.074	3	184.073	184.073	3
58	PC 38:6	806.569	806.562	9	184.073	184.072	8	184.073	184.073	1
59	PC 40:6	834.601	834.594	8	184.073	184.074	6	184.073	184.074	1
60	PC 46:5	920.71	920.702	9	184.073	184.073	3	184.073	184.073	1
61	PC 48:5	948.742	948.734	8	184.073	184.075	7	184.073	184.073	0
62	PC O-30:1	690.543	690.549	8	184.073	184.074	5	507.477	507.473	7
63	PC O-34:5	738.543	738.537	9	184.073	184.075	7	555.477	555.478	1
64	PC O-42:2	856.715	856.722	8	184.073	184.073	1	673.649	673.644	8
65	PC O-42:3	854.7	854.707	8	184.073	184.074	1	671.634	671.628	8
66	PC O-44:2	884.747	884.754	9	184.073	184.072	5	701.681	701.681	1
67	PC O-44:3	882.731	882.739	9	184.073	184.073	0	699.665	699.661	6
68	PC O-44:4	880.715	880.721	6	184.073	184.072	6	697.649	697.649	0
69	PC O-46:4	908.747	908.754	8	184.073	184.075	8	725.681	725.678	3
70	PC O-46:5	906.731	906.732	2	184.073	184.072	6	723.665	723.662	4
71	PE 28:1	634.444	634.442	4	142.026	142.026	1	-	-	-
72	PE 30:6	652.397	652.403	8	142.026	142.027	5	-	-	-
73	PE 32:2	688.491	688.497	8	142.026	142.027	1	-	-	-
74	PE 34:0	720.554	720.56	8	142.026	142.027	2	-	-	-
75	PE 36:1	746.569	746.563	8	142.026	142.025	7	-	-	-
76	PE 36:2	744.554	744.549	7	142.026	142.028	8	-	-	-
77	PE 36:3	742.538	742.532	8	142.026	142.025	7	-	-	-
78	PE 36:5	738.507	738.513	9	142.026	142.026	5	-	-	-
79	PE 38:2	772.585	772.578	9	142.026	142.027	7	-	-	-
80	PE 38:3	770.569	770.563	8	142.026	142.027	5	-	-	-
81	PE 38:4	768.554	768.547	8	142.026	142.025	7	-	-	-
82	PE 38:5	766.538	766.531	9	142.026	142.026	3	-	-	-
83	PE 38:6	764.522	764.516	9	142.026	142.026	2	-	-	-
84	PE 40:5	794.569	794.576	9	142.026	142.026	2	-	-	-
85	PE 40:6	792.554	792.548	8	142.026	142.025	8	-	-	-
86	PE 42:5	822.601	822.594	9	142.026	142.028	9	-	-	-
87	PE 42:6	820.585	820.582	4	142.026	142.026	6	-	-	-
88	PE O-34:1	704.559	704.565	9	142.026	142.026	2	563.54	563.538	3
89	PE O-34:3	700.528	700.533	7	142.026	142.025	7	559.508	559.511	5
90	PE O-36:3	728.559	728.552	9	142.026	142.027	2	587.54	587.536	6
91	PE O-36:4	726.543	726.544	2	142.026	142.025	8	585.524	585.524	0
92	PE O-36:5	724.528	724.522	8	142.026	142.026	1	583.508	583.504	8
93	PE O-36:6	722.512	722.505	9	142.026	142.026	3	581.493	581.497	7
94	PE O-38:5	752.559	752.552	9	142.026	142.028	8	611.54	611.539	2
95	PE O-38:6	750.543	750.537	8	142.026	142.026	6	609.524	609.522	3
96	PE O-42:1	816.684	816.677	9	142.026	142.026	3	675.665	675.66	7
97	PE O-42:2	814.668	814.674	7	142.026	142.028	9	673.649	673.649	0
98	PE O-44:0	846.731	846.738	8	142.026	142.025	7	705.712	705.708	5
99	PE O-44:1	844.715	844.723	9	142.026	142.028	8	703.696	703.694	4
100	PE O-46:0	874.762	874.77	8	142.026	142.027	3	733.743	733.749	7
101	PE O-46:1	872.747	872.755	9	142.026	142.028	9	731.728	731.727	1
102	PE O-46:2	870.731	870.739	9	142.026	142.026	2	729.712	729.707	6
103	PE O-48:0	902.794	902.799	6	142.026	142.026	4	761.775	761.775	1
104	PE O-48:1	900.778	900.785	7	142.026	142.028	8	759.759	759.757	3
105	PE O-48:2	898.762	898.769	8	142.026	142.027	6	757.743	757.746	4
106	SM 30:2	645.497	645.502	8	184.073	184.073	2	-	-	-
107	SM 34:0	705.591	705.585	8	184.073	184.073	0	-	-	-
108	SM 34:1	703.575	703.569	9	184.073	184.073	3	-	-	-
109	SM 34:2	701.559	701.553	9	184.073	184.073	4	-	-	-
110	SM 36:1	731.606	731.6	9	184.073	184.072	7	-	-	-
111	SM 36:4	725.559	725.553	9	184.073	184.073	3	-	-	-
112	SM 42:1	815.7	815.693	8	184.073	184.072	8	-	-	-
113	SM 42:2	813.684	813.677	9	184.073	184.073	2	-	-	-
114	SM 44:0	845.747	845.74	9	184.073	184.075	7	-	-	-
115	SM 44:1	843.731	843.725	8	184.073	184.074	1	-	-	-
116	SM 44:2	841.716	841.711	5	184.073	184.072	6	-	-	-
117	SM 46:0	873.778	873.771	8	184.073	184.073	0	-	-	-
118	SM 46:1	871.763	871.755	8	184.073	184.075	8	-	-	-
119	SM 46:6	861.684	861.677	9	184.073	184.073	1	-	-	-
120	SM 48:0	901.81	901.802	8	184.073	184.074	3	-	-	-
121	SM 48:1	899.794	899.787	8	184.073	184.075	9	-	-	-
